# Supplementary material
Source: PubMed Central journal article supplement (PMC8342966)
Supplement: mmc1.pdf [file mmc1.pdf]

Supplementary Material for:

How will mass-vaccination change COVID-19 lockdown requirements in  
Australia?

Cameron Zachreson<sup>1,2</sup>, Sheryl L. Chang<sup>1</sup>, Oliver M. Cliff<sup>1</sup>, Mikhail Prokopenko<sup>1,3</sup>

<sup>1</sup> *Centre for Complex Systems, Faculty of Engineering, University of Sydney, Sydney, NSW 2006, Australia*

<sup>2</sup> *School of Computing and Information Systems, The University of Melbourne, Parkville, VIC 3052, Australia*

<sup>3</sup> *Sydney Institute for Infectious Diseases, University of Sydney, Westmead, NSW 2145, Australia*

*Correspondence to:*

*Prof Mikhail Prokopenko, Centre for Complex Systems  
Faculty of Engineering, University of Sydney, Sydney, NSW 2006, Australia  
[mikhail.prokopenko@sydney.edu.au](mailto:mikhail.prokopenko@sydney.edu.au)*

## Appendix

### *Constraints on vaccine efficacy*

The efficacy of a vaccine can be decomposed into three components:

- the efficacy for susceptibility (VEs) which determines the level of immunity induced in susceptible individuals
- the efficacy for disease (VEd) which determines protection against symptomatic illness if a vaccinated individual is infected
- efficacy against infectiousness (VEi) which determines how contagious a vaccinated individual will be if they become infected

The clinical efficacy (VEc), which is measured in stage-3 clinical trials and corresponds to the reported efficacy numbers for both vaccines, is a function of VEs and VEd, neither of which are directly measured:

$$\text{VEc} = \text{VEd} + \text{VEs} - \text{VEsVEd}, \quad (\text{S1})$$

while the efficacy for transmission, VE, which is the value of interest for computing herd immunity is a function of vaccine coverage ( $c$ ), VEi, VEs, and VEd. Because VEi is not constrained by VEc through Equation S1, the population-level effectiveness is currently uncertain for both vaccines.

In the worst-case scenario, the factor VEd would account for 100% of the clinical efficacy (VEd = VEc, VEs = 0), and the efficacy against transmission would be negligible (VEi = 0), which would leave all unvaccinated individuals unprotected. In this scenario, herd immunity is not possible per se (though complete coverage would provide clinical protection to the entire population). In the best-case scenario, efficacy against symptoms would be maximised (VEd = VEc), protecting all vaccinated individuals regardless of their infection status, while the unknown parameter VEi would take a value of 1, and all transmission from vaccinated individuals would cease, protecting both vaccinated and unvaccinated subpopulations. In reality, the true efficacy values will lie between these extremes, and may be correlated. For example, because symptoms may increase the contagiousness of those infected, VEd can positively influence VEi. On the other hand, symptoms can also lead to case detection and behavioural change, which may produce a negative relationship between VEd and VEi.

### *Vaccine efficacy: homogeneous approximation*

Here, we give a homogeneous approximation for vaccine efficacy and the associated herd immunity thresholds as functions of VEs, VEi, and VEd. We derive an expression for overall reduction to force of infection provided by a vaccination program with coverage  $c \in [0, 1]$  as follows:

$$\text{VE} = 1 - F_{vax}/F_o, \quad (\text{S2})$$

where  $F_o$  is proportional to the overall force of infection when none of the population is vaccinated, and  $F_{vax}$  is the relative reduction to force of infection produced through vaccination. For a given prevalence of infection  $p(\text{infected}) = N_{\text{infected}}/N_{\text{tot}} \ll 1 = 1 - p(\text{susceptible})$ , and assuming a negligible recovered population, we compute  $F_o$  as:

$$F_o = \beta_o^2 p(\text{infected}) p(\text{susceptible}), \quad (\text{S3})$$

in which  $\beta_o$  is the average force of infection produced by an infected individual who is unvaccinated:

$$\beta_o = \beta(p_s + a(1 - p_s)) \quad (\text{S4})$$

in which  $\beta$  is the force of infection from a symptomatic individual,  $p_s$  is the probability of expressing symptoms if infected and unvaccinated (in this work we assumed a symptomatic fraction of 2/3) and  $a$  is the factor by which force of infection is reduced if an infected agent is asymptomatic (for this work  $a = 0.3$ ).

The  $p(\text{infected})p(\text{susceptible})$  term in Eq. (S3) captures the potential for interaction between susceptible and infected individuals, the potential for transmission given interaction is given by one of the  $\beta_o$  terms, and the infectious potential of the newly infected individual, should transmission take place, is given by the second  $\beta_o$  term.

The relative force of infection with vaccination,  $F_{\text{vax}}$ , can be found similarly by summing the potential for contact and transmission between individuals with different vaccination status:

$$F_{\text{vax}} = F_{\text{unvax} \rightarrow \text{unvax}} + F_{\text{unvax} \rightarrow \text{vax}} + F_{\text{vax} \rightarrow \text{unvax}} + F_{\text{vax} \rightarrow \text{vax}} , \quad (\text{S5})$$

where

$$F_{\text{unvax} \rightarrow \text{vax}} = \beta \beta_{\text{vax}} (1 - \text{VEs}) p(\text{infected, unvaccinated}) p(\text{susceptible, vaccinated}) , \quad (\text{S6})$$

in which

$$\beta_{\text{vax}} = \beta (1 - \text{VEi}) [p_s (1 - \text{VEd}) + a (1 - p_s (1 - \text{VEd}))] , \quad (\text{S7})$$

is the average force of infection from a vaccinated individual who becomes infected. Note that both VEi and VEd play a role in computing  $\beta_{\text{vax}}$ . The remaining terms of Eq. (S5) are:

$$F_{\text{vax} \rightarrow \text{unvax}} = \beta_{\text{vax}} \beta_o p(\text{infected, vaccinated}) p(\text{susceptible, unvaccinated}) , \quad (\text{S8})$$

and

$$F_{\text{vax} \rightarrow \text{vax}} = \beta_{\text{vax}}^2 (1 - \text{VEs}) p(\text{infected, vaccinated}) p(\text{susceptible, vaccinated}) . \quad (\text{S9})$$

The joint probabilities

- $p(\text{infected, unvaccinated})$ ,
- $p(\text{infected, vaccinated})$ ,
- $p(\text{susceptible, unvaccinated})$ , and
- $p(\text{susceptible, vaccinated})$

can be represented as products of the conditional and independent probabilities of infection, vaccination, and infection given vaccination:

$$p(\text{infected, unvaccinated}) = p(\text{infected} \mid \text{unvaccinated}) p(\text{unvaccinated}) , \quad (\text{S10})$$

$$p(\text{susceptible, unvaccinated}) = p(\text{susceptible} \mid \text{unvaccinated}) p(\text{unvaccinated}) , \quad (\text{S11})$$

$$p(\text{infected, vaccinated}) = p(\text{infected} \mid \text{vaccinated}) p(\text{vaccinated}) , \quad (\text{S12})$$

$$p(\text{susceptible, vaccinated}) = p(\text{susceptible} \mid \text{vaccinated}) p(\text{vaccinated}) , \quad (\text{S13})$$

where

$$p(\text{vaccinated}) = c , \quad (\text{S14})$$

$$p(\text{unvaccinated}) = 1 - c , \quad (\text{S15})$$

$$p(\text{susceptible} \mid \text{unvaccinated}) = 1 - p(\text{infected} \mid \text{unvaccinated}) , \quad (\text{S16})$$

$$p(\text{susceptible} \mid \text{vaccinated}) = 1 - p(\text{infected} \mid \text{vaccinated}) , \quad (\text{S17})$$

$$p(\text{infected} \mid \text{unvaccinated}) = \frac{p(\text{infected}) - p(\text{infected} \mid \text{vaccinated}) p(\text{vaccinated})}{1 - p(\text{vaccinated})} , \quad (\text{S18})$$

and

$$p(\text{infected} \mid \text{vaccinated}) = p(\text{infected}) (1 - \text{VEs}) \frac{\beta_{\text{vax}}}{\beta} , \quad (\text{S19})$$

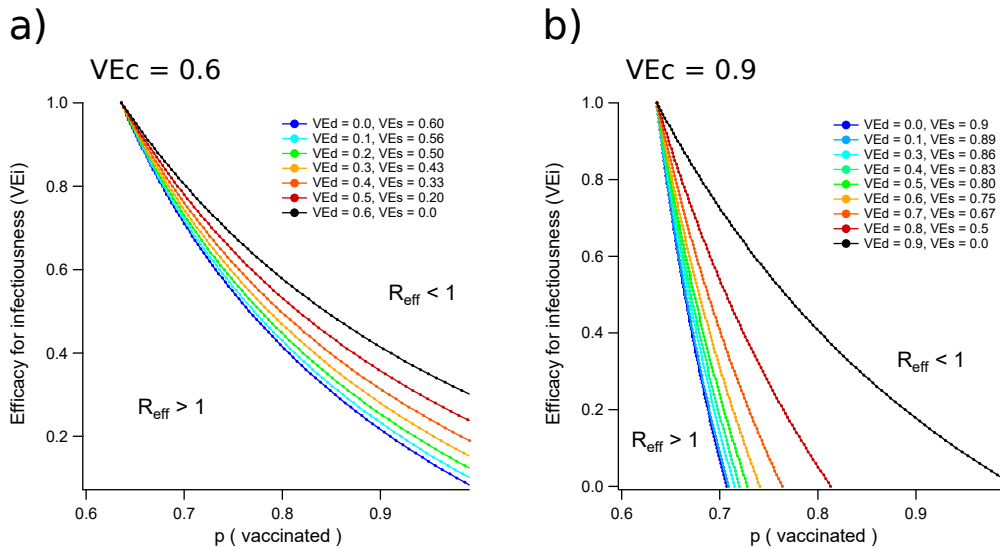

Figure S1: Herd immunity thresholds as functions of efficacy for infectiousness (VEi) and vaccine coverage ( $p(\text{vaccinated})$ ) computed through a homogeneous approximation of vaccine effectiveness taking into account three forms of vaccine efficacy (VEs, VEd, and VEi). Subplot (a) shows thresholds for the general vaccine, with clinical efficacy  $VEc = 0.6$ , while subplot (a) shows thresholds for the priority vaccine with clinical efficacy  $VEc = 0.9$ .

where the ratio  $\beta_{\text{vax}}/\beta$  gives the effect of VEd and VEi on infectiousness of vaccinated individuals (Eq. (S7)). Here, the state denoted “infected” would more precisely be described as “infectious”, because VEi and VEd reduce transmission potential without reducing the infection probability of vaccinated individuals.

Assuming that the effective reproductive ratio  $R$  is proportional to the force of infection  $F_{\text{vax}}$ , it can be computed from the total efficacy, VE, as

$$R = R_0(1 - VE), \quad (\text{S20})$$

where  $R_0$  is the basic reproductive number for the epidemic, which we set to  $R_0 = 2.75$  in the present work. Using  $R_0 = 2.75$ , Fig. S1 demonstrates the coverage threshold for herd immunity as a function of VEi, VEs, and VEd given  $VEc = 0.6$  (Fig. S1a), and  $VEc = 0.9$  (Fig. S1b).

The homogeneous approximation corresponds qualitatively to the results of the ABM which demonstrates a dramatic decrease in growth rate after increasing coverage crosses the  $R = 1$  boundary estimated by evaluating Eq. (S20) for  $R_0 = 2.75$  (Fig. S2, Fig. S3). However, due to heterogeneity in population structure and vaccine allocation we still observed substantial epidemic growth for parameter combinations which correspond to  $R < 1$  based on the homogeneous approximation. For the priority vaccine ( $VEc = 0.9$ ), the threshold computed through the homogeneous approximation matched the observed nonlinear decrease in growth rate more closely (Fig. S2b), but finite epidemics were still observed for coverage  $\leq 79\%$ . The boundary computed by the homogeneous approximation should therefore be viewed as an optimistic estimate of coverage threshold.

Epidemic severity as measured by peak prevalence follows the expected trend based on the homogeneous approximation (Fig. S3 and Fig. S4). However, for simulations with growth rates less than  $\approx 0.06$ , peak prevalence was not reached within the simulation time frame of 194 days (these scenarios are indicated as open black circles in Fig. S3 and Fig. S4). The correspondence between the herd immunity threshold computed through the homogeneous approximation and the tendency for simulations to reach peak prevalence within 194 days is an artefact of the choice of simulation horizon.

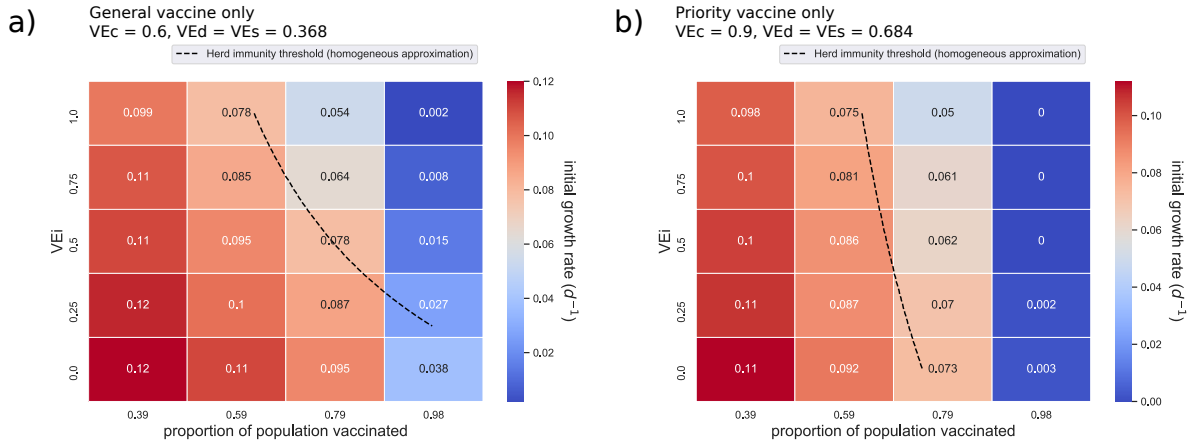

Figure S2: Alignment of ABM results with homogeneous approximation of herd immunity thresholds for the general (a) and priority (b) vaccines. The growth rates were computed from results generated by the ABM over a range of values for coverage and vaccine efficacy against infectiousness. The dashed black lines give the coverage thresholds for herd immunity estimated by the homogeneous approximation. Here, central values of efficacy against disease and susceptibility were used ( $VEd = VEs = 1 - \sqrt{1 - VEc}$ ).

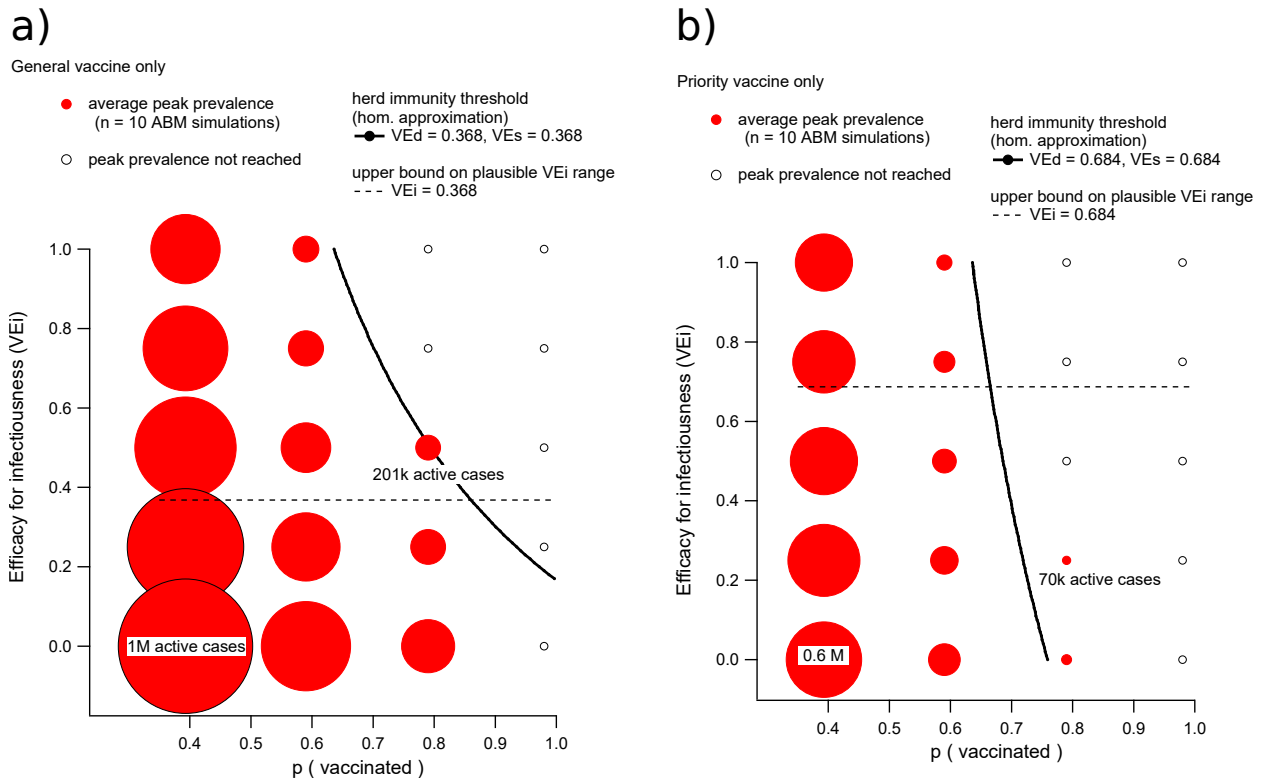

Figure S3: Alignment of ABM results with homogeneous approximation of herd immunity thresholds for the general (a) and priority (b) vaccines. The peak prevalence values shown here (red circles) generated by the ABM over a range of values for coverage and vaccine efficacy against infectiousness. The solid black lines give the coverage thresholds for herd immunity estimated by the homogeneous approximation, and the dashed lines illustrate conservative practical upper bounds on  $VE_i$ . Here, central values of efficacy against disease and susceptibility were used ( $VEd = VEs = 1 - \sqrt{1 - VEc}$ ). Open black dots indicate simulation sets that did not consistently reach a defined prevalence maximum before the endpoint of 194 days.

a)

General vaccine with targeted interventions

- average peak prevalence (n = 10 ABM simulations)
- peak prevalence not reached
- herd immunity threshold (hom. approximation)
  - VEd = 0.368, VEs = 0.368
  - VEi = 0.368
- upper bound on plausible VEi range

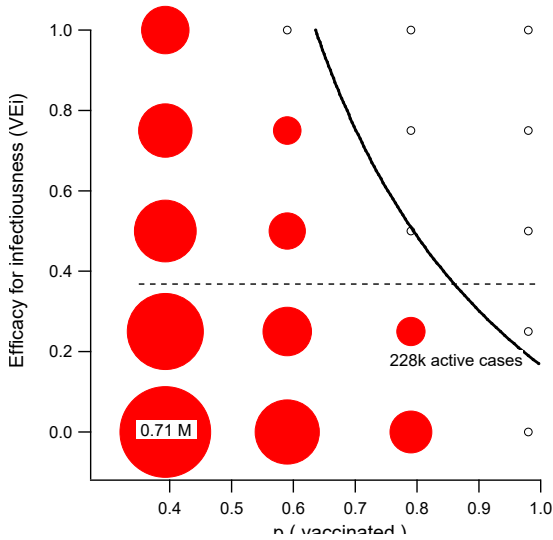

b)

Priority vaccine with targeted interventions

- average peak prevalence (n = 10 ABM simulations)
- peak prevalence not reached
- herd immunity threshold (hom. approximation)
  - VEd = 0.684, VEs = 0.684
  - VEi = 0.684
- upper bound on plausible VEi range

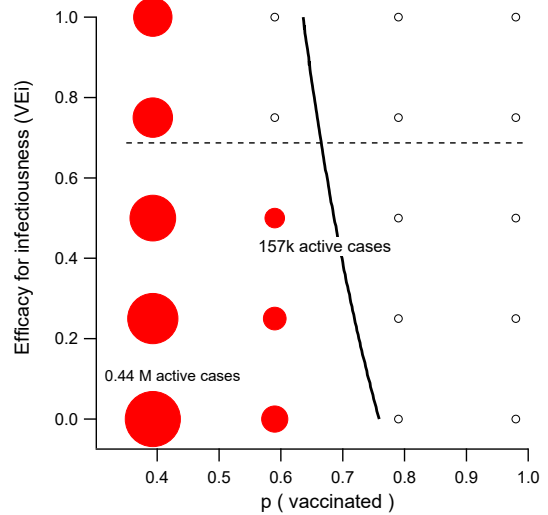

Figure S4: Alignment of ABM results with homogeneous approximation of herd immunity thresholds for the general (a) and priority (b) vaccines, combined with case-targeted nonpharmaceutical interventions. The peak prevalence values shown here (red circles) generated by the ABM over a range of values for coverage and vaccine efficacy against infectiousness. The solid black lines give the coverage thresholds for herd immunity estimated by the homogeneous approximation, and the dashed lines illustrate conservative practical upper bounds on VEi. Here, central values of efficacy against disease and susceptibility were used ( $VEd = VEs = 1 - \sqrt{1 - VEc}$ ). Open black dots indicate simulation sets that did not consistently reach a defined prevalence maximum before the endpoint of 194 days.

### Model calibration

Primary calibration was performed by first tuning disease parameters  $\kappa$ , and the bounds of  $T_{\text{symp}}$  for a basic reproductive number falling within the range specified in literature reports<sup>[1]</sup>. To compute  $R_0$  for a given set of parameters, we performed an age-group biased micro-simulation Monte Carlo estimate of secondary cases produced by a typical index case as described in our previous studies<sup>[2,3]</sup>.

We then tuned the parameters defining case-targeted NPIs to match the early incidence data issued in Australia during the initial wave of COVID-19 in March 2020. The resulting incidence growth rates generated by our ABM (growth rate  $\approx 0.118$ ) lie between the plausible values estimated for the first wave of COVID-19 (growth rate  $\approx [0.1, 0.2]$  Fig. S5a). If the first three cases are ignored when determining the growth rate for the first wave, the calculated rate doubles (Fig. S5a), but provides a better fit to the remaining case data. It is unclear whether this discrepancy occurred due to ineffective case ascertainment (due to e.g., delays to initial surveillance efforts), or to stochastic die-out of the outbreak that produced the first recorded cases.

On the other hand, the growth rate produced by our ABM closely matches the rate estimated for the second wave, which began in early June, 2020, was confined to the state of Victoria, and occurred mostly within the urban area of Greater Melbourne<sup>[4]</sup> (growth rate  $\approx 0.123$ , Fig. S5b). While our ABM simulates the entirety of Australia, early cases mostly arise in urban centres which contain the international airports from which importations are generated<sup>[5]</sup>. Therefore, a close match between the growth rates generated by our model and the rate observed during the beginning of the second wave in Greater Melbourne indicates that our simulations produce reasonable approximations to the early disease dynamics of an Australian outbreak.

The parameters defining population-scale NPIs (lockdown) were chosen to match the peak incidence and prevalence data produced during the first wave, which was suppressed with a national-scale lockdown (Fig. S6). While the initial incidence growth dynamics of our model are qualitatively similar to observations from the 1st wave (Fig. S5b, Fig. S6a), and well-matched to those observed during the second wave (Fig. S5b), there are some aspects of the observed data from the first wave that are not reproduced well by our model. In particular, simulated case prevalence is substantially lower than the number of active cases reported during the first wave. This is a direct consequence of our decision to model the infectious period after symptom onset in accordance to the period of replication competent viral shedding rather than the period over which a case may test positive (which can be longer by 1-2 weeks<sup>[6]</sup>). Therefore, in our model a case recovers and is no longer included in the prevalence count substantially earlier than it would be removed from an active case count ascertained through PCR tests. In addition, the cumulative incidence produced by our model is higher than what was observed in the first wave during March 2020 (Fig. S6b). However, this discrepancy only becomes substantial during the period after lockdown was implemented, so it can be interpreted as the consequence of our conservative estimates in the efficacy of lockdown on transmission in various contexts (Table S3). We chose conservative values for these parameters, so that our estimates of lockdown thresholds would err on the side of caution.

| parameter                                    | value            | distribution                              | notes                                     |
|----------------------------------------------|------------------|-------------------------------------------|-------------------------------------------|
| $\kappa$                                     | 2.4              | NA                                        | global transmission scalar                |
| $T_{\text{inc}}$                             | 5.5 days (mean)  | lognormal( $\mu = 1.62, \sigma = 0.418$ ) | incubation period                         |
| $T_{\text{symp}}$                            | 10.5 days (mean) | uniform [7, 14]                           | symptomatic (or asymptomatic) period      |
| $a$                                          | 0.3              | NA                                        | asymptomatic transmission scalar          |
| $p_{\text{symptomatic}} \mid \text{adult}$   | 0.67             | NA                                        | probability of symptoms (age < 18)        |
| $p_{\text{symptomatic}} \mid \text{child}$   | 0.134            | NA                                        | probability of symptoms (age 18+)         |
| $p_{\text{detect}} \mid \text{symptomatic}$  | 0.227            | NA                                        | daily case detection prob. (symptomatic)  |
| $p_{\text{detect}} \mid \text{asymptomatic}$ | 0.01             | NA                                        | daily case detection prob. (asymptomatic) |

Table S1: Key control parameters for COVID-19 transmission model.

| parameter                         | value | distribution | notes                                   |
|-----------------------------------|-------|--------------|-----------------------------------------|
| $p_{CI}$                          | 0.7   | NA           | case isolation compliance rate          |
| $p_{HQ}$                          | 0.5   | NA           | home quarantine compliance rate         |
| $T_{HQ}$                          | 14 d  | NA           | home quarantine duration                |
| $f_{\text{home}}(\text{HQ})$      | 2     | NA           | NPI transmission scalar (HQ, home)      |
| $f_{\text{community}}(\text{HQ})$ | 0.25  | NA           | NPI transmission scalar (HQ, community) |
| $f_{\text{workplace}}(\text{HQ})$ | 0.25  | NA           | NPI transmission scalar (HQ, workplace) |
| $f_{\text{home}}(\text{CI})$      | 1     | NA           | NPI transmission scalar (CI, home)      |
| $f_{\text{community}}(\text{CI})$ | 0.25  | NA           | NPI transmission scalar (CI, community) |
| $f_{\text{workplace}}(\text{CI})$ | 0.25  | NA           | NPI transmission scalar (CI, workplace) |

Table S2: Key control parameters for targeted NPIs. NPI transmission scalars multiply the force of infection produced by infected individuals in the specified contexts. Compliance rates determine the proportion of individuals who act in accordance with the specified measures (case isolation, CI; home-quarantine of household contacts, HQ).

| parameter                         | value    | distribution | notes                                           |
|-----------------------------------|----------|--------------|-------------------------------------------------|
| $p_{LD}$                          | variable | [0, 1]       | lockdown compliance rate                        |
| $T_{LD}$                          | 91 d     | NA           | lockdown duration                               |
| $f_{\text{home}}(\text{LD})$      | 1        | NA           | NPI transmission scalar factor (LD, home)       |
| $f_{\text{community}}(\text{LD})$ | 0.25     | NA           | NPI transmission scalar factor (LD, community)  |
| $f_{\text{workplace}}(\text{LD})$ | 0.1      | NA           | NPI transmission scalar (LD, workplace)         |
| $AR_{\text{trigger}}(\text{LD})$  | 2000     | NA           | cum. incidence triggering population-level NPIs |

Table S3: Key control parameters for population-level NPIs (lockdown, LD).

| parameter        | value from ABM           | target value         | notes                                                 |
|------------------|--------------------------|----------------------|-------------------------------------------------------|
| $R_0$            | 2.75 [2.71, 2.80]        | 2.9 [2.39, 3.44]     | basic reproductive ratio <sup>[1]</sup>               |
| $T_{\text{gen}}$ | 7.14 [7.05, 7.23]        | 7.0 days [5.8, 8.1]  | generation/serial interval <sup>[7]</sup>             |
| growth rate      | 0.118 [0.110, 0.127]     | 0.10 [0.097, 0.103]  | growth rate of case incidence (1st wave)              |
| growth rate      | 0.118 [0.110, 0.127]     | 0.201 [0.170, 0.233] | growth rate of case incidence (1st wave, from day 21) |
| growth rate      | 0.118 [0.110, 0.127]     | 0.123 [0.102, 0.143] | growth rate of case incidence (2nd wave, VIC)         |
| peak prevalence  | 2790, range [2623, 3059] | 4935                 | peak case prevalence (1st wave)                       |
| peak incidence   | 377, range [336, 415]    | 497                  | peak case incidence (1st wave)                        |

Table S4: Calibration targets for key model outputs.



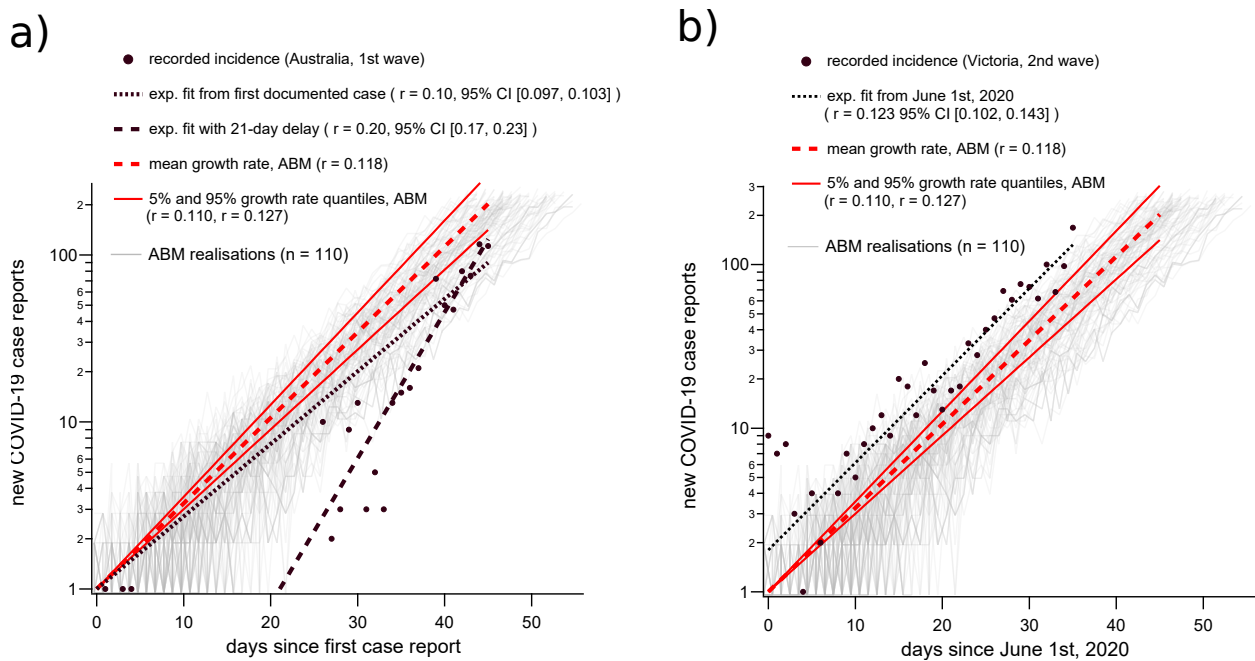

Figure S5: The growth rate computed by the ABM with case-targeted NPIs approximately matches the rate computed for the 2nd wave of COVID-19 in Victoria. Incidence growth rates computed by the model are compared to case data recorded by the Australian Department of Health for the 1st wave of COVID-19 (beginning on Feb. 3rd, 2020) (a), and case data recorded by the Victorian Department of Health and Human Services for the 2nd wave of COVID-19 (b).

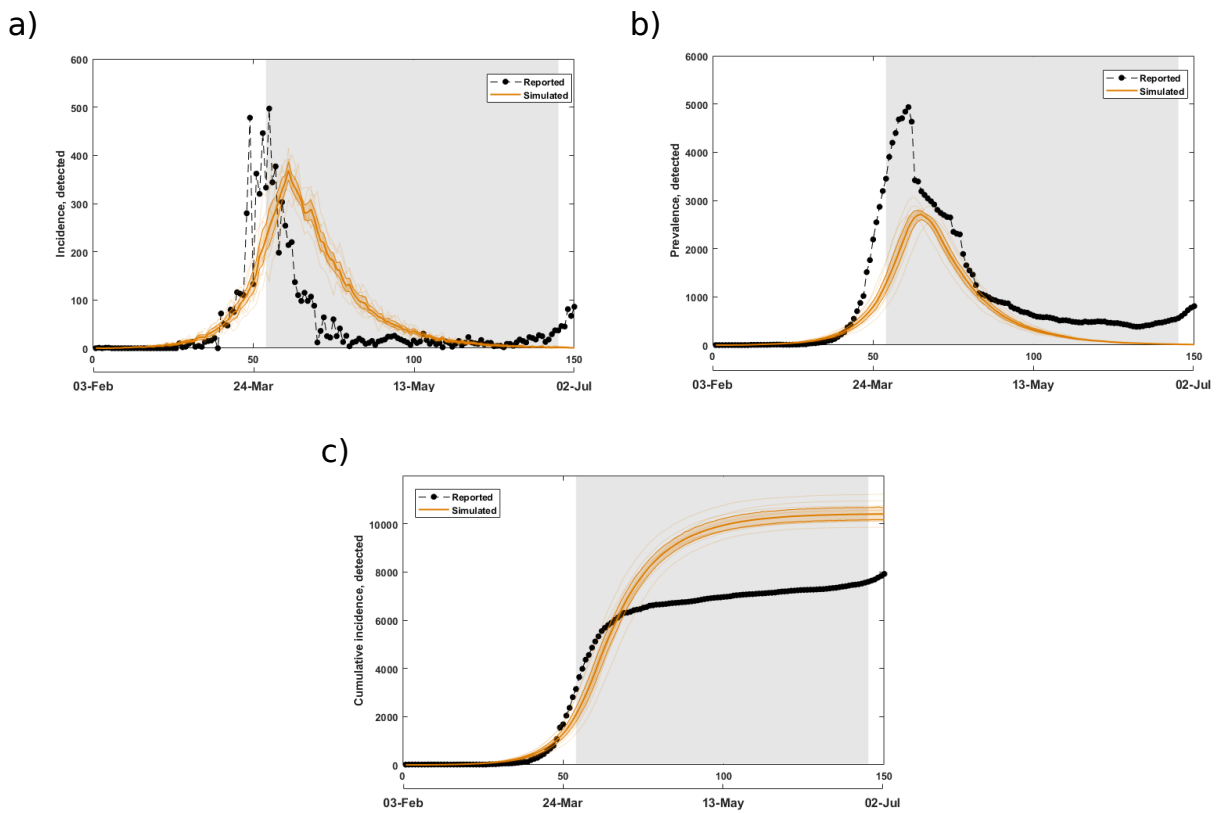

Figure S6: Alignment of model results with recorded case data from the first wave of COVID-19 in Australia. Daily case incidence is shown in (a), with reported case data shown as black dots connected by dashed lines and mean case incidence produced by the ABM shown as a solid yellow line (shaded bands represent 95% bootstrap CI bounds). The output of individual instances of the ABM ( $n = 10$ ) are shown as transparent yellow traces. Case prevalence (active case counts) are shown in (b), and cumulative case incidence is shown in (c). The grey shaded region corresponds to the lockdown period used in the ABM, which utilised a lockdown compliance level of 90% to match the conditions used in our previous work<sup>[3]</sup>.

*Sensitivity of lockdown threshold to vaccine efficacy and age-specific priority*

Figures S7 and S8 present results of a sensitivity analysis with respect to vaccine efficacy and vaccine allocation priority among the three age groups used in our model. Vaccine efficacies and vaccine age-group priority specifications are given in the figure legends. Rollout ratios listed in the legends  $[x_1 : x_2 : x_3]$  correspond to age groups  $[65+ : 18-64 : <18]$ , the revised rollout numbers  $[2547:30000:1000]$  were chosen in order to invert the priority vaccine distribution between 65+ and 18-64 age groups, while holding constant the overall number of vaccines distributed to each age group as allocated by the original 100:10:1 priority system.

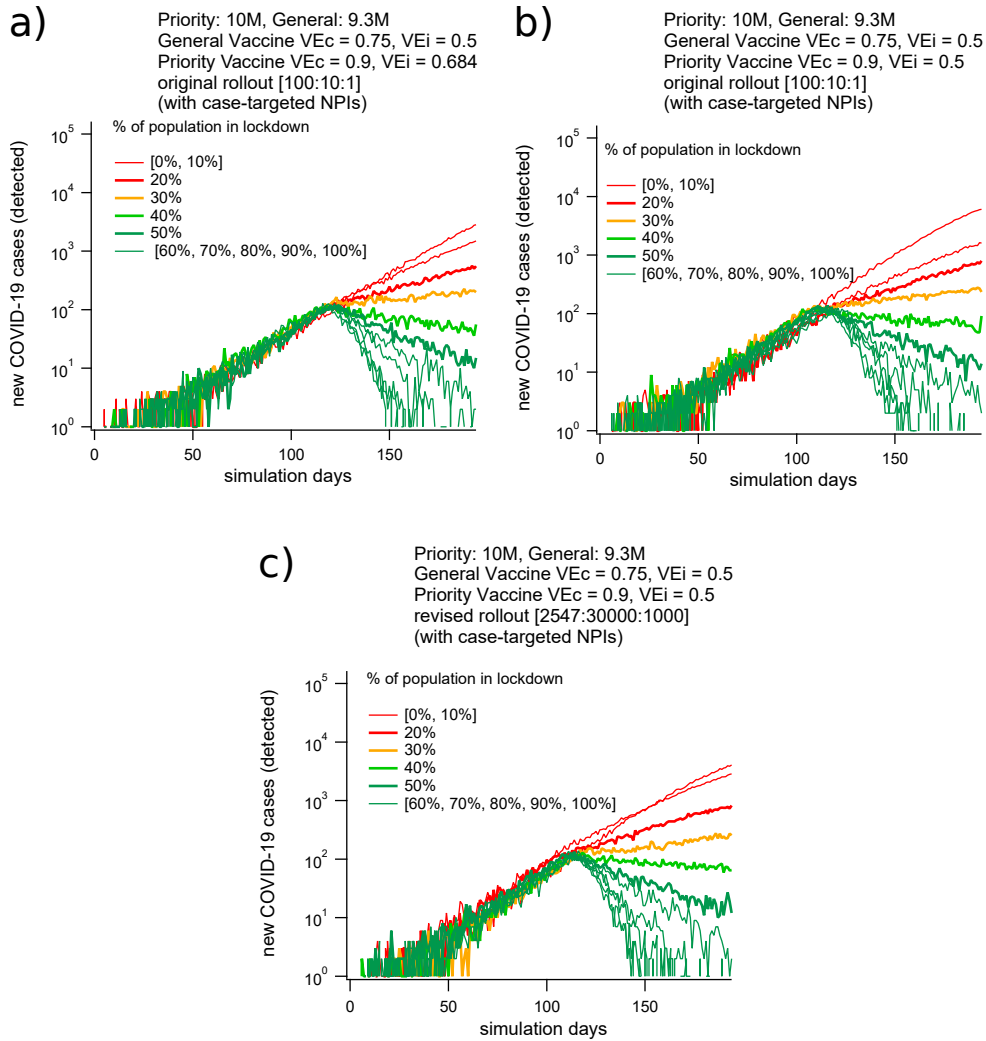

Figure S7: Within realistic parameter ranges, the lockdown compliance thresholds for elimination are not sensitive to vaccine efficacy assumptions or vaccine priority for different age groups. Representative incidence trajectories for different lockdown compliance rates demonstrate an elimination threshold between 30% and 40% for three alternative vaccine rollout scenarios. The trajectories in (a) correspond to increasing the three efficacy components for the general vaccine from 0.368 to 0.5, to approximate estimates from recent population-scale trial data. The trajectories in (b) further modify the efficacy of the priority vaccine against infectiousness from 0.684 to 0.5, reducing it in line with recent estimates. In (c), an alternate priority schedule is tested, in which adults between the ages of 18 and 64 are prioritised over those aged 65+, to approximate recent changes to recommendations against the use of general vaccine, ChAdOx1 nCoV-19 (Oxford/AstraZeneca), in younger adults.

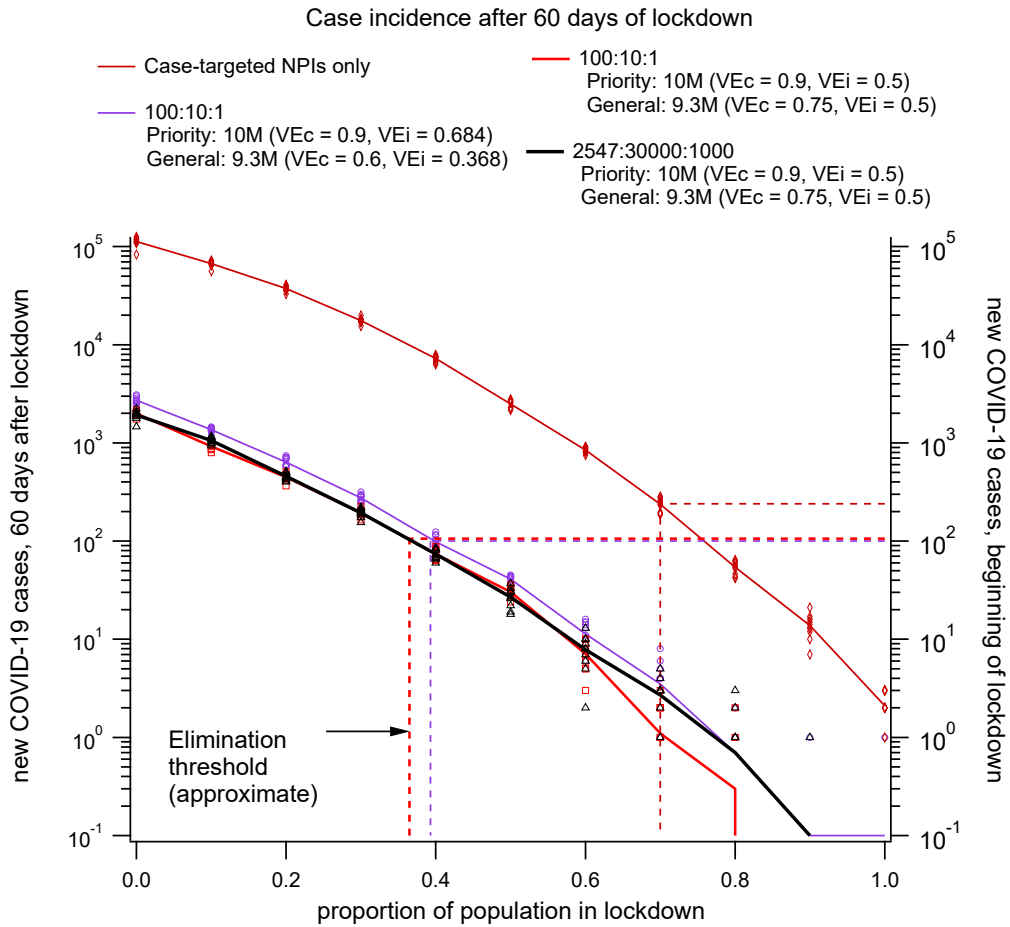

Figure S8: The intensity of lockdown required for gradual elimination of the virus is not sensitive to revised vaccine efficacy estimates or to a revised priority schedule. Solid lines connect ensemble averages of case incidence 60 days into the lockdown period for each scenario (left y-axis) while the values recorded from each individual simulation are shown as symbols. Each horizontal dashed line corresponds to the average incidence at the onset of lockdown (right y axis) for the vaccination scenario labelled with the same colour. The vertical dashed lines correspond to the approximate proportion of the population in lockdown required for case incidence to decrease, in each vaccination scenario. We omitted black dashed lines corresponding to the revised scenario with updated vaccine efficacy because they overlap closely with the red dashed lines corresponding to the original priority schedule with updated vaccine efficacy.

#### *Epidemic severity as a function of vaccine efficacy and coverage*

Here we provide full ABM results for epidemic severity as measured by initial incidence growth rates, peak prevalence levels and the timing of the prevalence peaks from the start of the epidemic as functions of  $VE_i$ ,  $VE_c$ ,  $VE_d$ , and coverage. Incidence growth rate is computed from the first detected case to the time at which cumulative cases exceed 2000, or the end of the simulation after 194 days.

**General Vaccination Only (no case-targeted NPIs), VEc = 0.6**

| population vaccinated: 2.3 M (~10%) |       |             |          |             |          |             |          |             |          |             |          |          |          |
|-------------------------------------|-------|-------------|----------|-------------|----------|-------------|----------|-------------|----------|-------------|----------|----------|----------|
| VEs                                 | Ved   | VEi         |          |             |          |             |          |             |          |             |          |          |          |
|                                     |       | 0           |          | 0.25        |          | 0.5         |          | 0.75        |          | 1           |          |          |          |
|                                     |       | growth rate | 95% CI   |          |          |
| 0                                   | 0.6   | 1.36E-01    | 1.31E-01 | 1.41E-01    | 1.30E-01 | 1.26E-01    | 1.33E-01 | 1.31E-01    | 1.28E-01 | 1.34E-01    | 1.31E-01 | 1.26E-01 | 1.36E-01 |
| 0.15                                | 0.529 | 1.35E-01    | 1.30E-01 | 1.39E-01    | 1.34E-01 | 1.29E-01    | 1.39E-01 | 1.31E-01    | 1.27E-01 | 1.35E-01    | 1.30E-01 | 1.26E-01 | 1.31E-01 |
| 0.368                               | 0.368 | 1.33E-01    | 1.28E-01 | 1.38E-01    | 1.29E-01 | 1.24E-01    | 1.34E-01 | 1.35E-01    | 1.30E-01 | 1.38E-01    | 1.28E-01 | 1.23E-01 | 1.32E-01 |
| 0.529                               | 0.15  | 1.31E-01    | 1.25E-01 | 1.37E-01    | 1.31E-01 | 1.27E-01    | 1.35E-01 | 1.26E-01    | 1.23E-01 | 1.29E-01    | 1.28E-01 | 1.25E-01 | 1.30E-01 |
| 0.6                                 | 0     | 1.32E-01    | 1.28E-01 | 1.37E-01    | 1.30E-01 | 1.24E-01    | 1.38E-01 | 1.30E-01    | 1.26E-01 | 1.33E-01    | 1.29E-01 | 1.26E-01 | 1.31E-01 |

  

| population vaccinated: 4.6 M (~20%) |       |             |          |             |          |             |          |             |          |             |          |          |          |
|-------------------------------------|-------|-------------|----------|-------------|----------|-------------|----------|-------------|----------|-------------|----------|----------|----------|
| VEs                                 | Ved   | VEi         |          |             |          |             |          |             |          |             |          |          |          |
|                                     |       | 0           |          | 0.25        |          | 0.5         |          | 0.75        |          | 1           |          |          |          |
|                                     |       | growth rate | 95% CI   |          |          |
| 0                                   | 0.6   | 1.30E-01    | 1.25E-01 | 1.35E-01    | 1.28E-01 | 1.24E-01    | 1.34E-01 | 1.24E-01    | 1.20E-01 | 1.28E-01    | 1.23E-01 | 1.20E-01 | 1.17E-01 |
| 0.15                                | 0.529 | 1.30E-01    | 1.26E-01 | 1.34E-01    | 1.24E-01 | 1.21E-01    | 1.28E-01 | 1.24E-01    | 1.21E-01 | 1.27E-01    | 1.23E-01 | 1.21E-01 | 1.20E-01 |
| 0.368                               | 0.368 | 1.32E-01    | 1.28E-01 | 1.36E-01    | 1.23E-01 | 1.20E-01    | 1.29E-01 | 1.29E-01    | 1.24E-01 | 1.33E-01    | 1.22E-01 | 1.18E-01 | 1.25E-01 |
| 0.529                               | 0.15  | 1.23E-01    | 1.20E-01 | 1.27E-01    | 1.26E-01 | 1.23E-01    | 1.29E-01 | 1.20E-01    | 1.17E-01 | 1.23E-01    | 1.22E-01 | 1.19E-01 | 1.20E-01 |
| 0.6                                 | 0     | 1.26E-01    | 1.23E-01 | 1.29E-01    | 1.23E-01 | 1.20E-01    | 1.26E-01 | 1.25E-01    | 1.21E-01 | 1.29E-01    | 1.23E-01 | 1.19E-01 | 1.26E-01 |

  

| population vaccinated: 9.2 M (~40%) |       |             |          |             |          |             |          |             |          |             |          |          |          |
|-------------------------------------|-------|-------------|----------|-------------|----------|-------------|----------|-------------|----------|-------------|----------|----------|----------|
| VEs                                 | Ved   | VEi         |          |             |          |             |          |             |          |             |          |          |          |
|                                     |       | 0           |          | 0.25        |          | 0.5         |          | 0.75        |          | 1           |          |          |          |
|                                     |       | growth rate | 95% CI   |          |          |
| 0                                   | 0.6   | 1.26E-01    | 1.23E-01 | 1.30E-01    | 1.18E-01 | 1.13E-01    | 1.23E-01 | 1.11E-01    | 1.08E-01 | 1.14E-01    | 1.06E-01 | 1.02E-01 | 1.01E-01 |
| 0.15                                | 0.529 | 1.19E-01    | 1.13E-01 | 1.24E-01    | 1.18E-01 | 1.16E-01    | 1.21E-01 | 1.11E-01    | 1.07E-01 | 1.15E-01    | 1.07E-01 | 1.03E-01 | 1.13E-01 |
| 0.368                               | 0.368 | 1.20E-01    | 1.16E-01 | 1.24E-01    | 1.16E-01 | 1.13E-01    | 1.20E-01 | 1.10E-01    | 1.06E-01 | 1.13E-01    | 1.07E-01 | 1.03E-01 | 1.11E-01 |
| 0.529                               | 0.15  | 1.16E-01    | 1.11E-01 | 1.20E-01    | 1.13E-01 | 1.10E-01    | 1.18E-01 | 1.07E-01    | 1.04E-01 | 1.12E-01    | 1.05E-01 | 1.02E-01 | 1.08E-01 |
| 0.6                                 | 0     | 1.15E-01    | 1.09E-01 | 1.20E-01    | 1.11E-01 | 1.07E-01    | 1.14E-01 | 1.04E-01    | 1.02E-01 | 1.07E-01    | 1.04E-01 | 1.01E-01 | 1.07E-01 |

  

| population vaccinated: 13.8 M (~80%) |       |             |          |             |          |             |          |             |          |             |          |          |          |
|--------------------------------------|-------|-------------|----------|-------------|----------|-------------|----------|-------------|----------|-------------|----------|----------|----------|
| VEs                                  | Ved   | VEi         |          |             |          |             |          |             |          |             |          |          |          |
|                                      |       | 0           |          | 0.25        |          | 0.5         |          | 0.75        |          | 1           |          |          |          |
|                                      |       | growth rate | 95% CI   |          |          |
| 0                                    | 0.6   | 1.19E-01    | 1.15E-01 | 1.23E-01    | 1.10E-01 | 1.08E-01    | 1.13E-01 | 1.00E-01    | 9.70E-02 | 1.03E-01    | 9.26E-02 | 8.85E-02 | 9.69E-02 |
| 0.15                                 | 0.529 | 1.17E-01    | 1.13E-01 | 1.20E-01    | 1.06E-01 | 1.03E-01    | 1.08E-01 | 9.91E-02    | 9.60E-02 | 1.02E-01    | 8.88E-02 | 8.62E-02 | 9.19E-02 |
| 0.368                                | 0.368 | 1.10E-01    | 1.06E-01 | 1.14E-01    | 1.01E-01 | 9.71E-02    | 1.04E-01 | 9.50E-02    | 9.28E-02 | 9.75E-02    | 8.47E-02 | 8.24E-02 | 8.82E-02 |
| 0.529                                | 0.15  | 1.04E-01    | 1.02E-01 | 1.08E-01    | 9.73E-02 | 9.35E-02    | 1.01E-01 | 9.20E-02    | 8.90E-02 | 9.53E-02    | 8.44E-02 | 8.12E-02 | 8.73E-02 |
| 0.6                                  | 0     | 1.04E-01    | 1.01E-01 | 1.06E-01    | 9.53E-02 | 9.29E-02    | 9.75E-02 | 9.08E-02    | 8.82E-02 | 9.32E-02    | 8.57E-02 | 8.31E-02 | 8.81E-02 |

  

| population vaccinated: 18.4 M (~80%) |       |             |          |             |          |             |          |             |          |             |          |          |          |
|--------------------------------------|-------|-------------|----------|-------------|----------|-------------|----------|-------------|----------|-------------|----------|----------|----------|
| VEs                                  | Ved   | VEi         |          |             |          |             |          |             |          |             |          |          |          |
|                                      |       | 0           |          | 0.25        |          | 0.5         |          | 0.75        |          | 1           |          |          |          |
|                                      |       | growth rate | 95% CI   |          |          |
| 0                                    | 0.6   | 1.12E-01    | 1.11E-01 | 1.14E-01    | 9.89E-02 | 9.38E-02    | 1.04E-01 | 8.74E-02    | 8.61E-02 | 8.86E-02    | 7.05E-02 | 6.86E-02 | 7.25E-02 |
| 0.15                                 | 0.529 | 1.08E-01    | 1.03E-01 | 1.12E-01    | 9.25E-02 | 8.98E-02    | 9.52E-02 | 8.36E-02    | 8.08E-02 | 8.63E-02    | 6.90E-02 | 6.73E-02 | 7.05E-02 |
| 0.368                                | 0.368 | 9.50E-02    | 9.17E-02 | 9.82E-02    | 8.68E-02 | 8.41E-02    | 8.94E-02 | 7.82E-02    | 7.58E-02 | 8.10E-02    | 6.41E-02 | 6.14E-02 | 6.71E-02 |
| 0.529                                | 0.15  | 9.28E-02    | 9.06E-02 | 9.59E-02    | 8.26E-02 | 8.02E-02    | 8.49E-02 | 7.27E-02    | 7.05E-02 | 7.48E-02    | 6.22E-02 | 6.02E-02 | 6.39E-02 |
| 0.6                                  | 0     | 8.80E-02    | 8.55E-02 | 9.10E-02    | 8.37E-02 | 7.97E-02    | 8.73E-02 | 6.98E-02    | 6.77E-02 | 7.26E-02    | 6.53E-02 | 6.30E-02 | 6.80E-02 |

  

| population vaccinated: 23 M (~100%) |       |             |          |             |          |             |          |             |          |             |          |          |          |
|-------------------------------------|-------|-------------|----------|-------------|----------|-------------|----------|-------------|----------|-------------|----------|----------|----------|
| VEs                                 | Ved   | VEi         |          |             |          |             |          |             |          |             |          |          |          |
|                                     |       | 0           |          | 0.25        |          | 0.5         |          | 0.75        |          | 1           |          |          |          |
|                                     |       | growth rate | 95% CI   |          |          |
| 0                                   | 0.6   | 3.78E-02    | 3.63E-02 | 3.98E-02    | 2.53E-02 | 2.35E-02    | 2.71E-02 | 1.52E-02    | 1.44E-02 | 1.60E-02    | 8.67E-03 | 7.75E-03 | 9.53E-03 |
| 0.15                                | 0.529 | 3.93E-02    | 3.69E-02 | 4.20E-02    | 2.81E-02 | 2.63E-02    | 2.97E-02 | 1.55E-02    | 1.47E-02 | 1.63E-02    | 9.66E-03 | 8.86E-03 | 1.06E-02 |
| 0.368                               | 0.368 | 3.81E-02    | 3.66E-02 | 4.00E-02    | 2.68E-02 | 2.58E-02    | 2.76E-02 | 1.54E-02    | 1.46E-02 | 1.63E-02    | 7.81E-03 | 6.72E-03 | 8.72E-03 |
| 0.529                               | 0.15  | 3.75E-02    | 3.53E-02 | 4.04E-02    | 2.84E-02 | 2.70E-02    | 2.99E-02 | 1.54E-02    | 1.41E-02 | 1.66E-02    | 8.46E-03 | 7.84E-03 | 9.23E-03 |
| 0.6                                 | 0     | 3.74E-02    | 3.49E-02 | 4.01E-02    | 2.70E-02 | 2.51E-02    | 2.94E-02 | 1.59E-02    | 1.51E-02 | 1.66E-02    | 8.98E-03 | 8.37E-03 | 9.68E-03 |

Table S5: Mean incidence growth rate values and 95% ensemble CIs produced by the ABM for various combinations of vaccine efficacy parameters and coverage levels, assuming a clinical efficacy of VEc = 0.6 and no case-targeted NPIs (n = 10 instances per scenario).

**General Vaccination Only (no case-targeted NPIs), VEc = 0.6**

| population vaccinated: 2.3 M (~10%) |       |            |          |            |          |            |          |            |          |            |          |            |          |            |          |          |
|-------------------------------------|-------|------------|----------|------------|----------|------------|----------|------------|----------|------------|----------|------------|----------|------------|----------|----------|
| VEs                                 | VEd   | VEI        |          |            |          |            |          |            |          |            |          |            |          |            |          |          |
|                                     |       | 0          |          |            | 0.25     |            |          | 0.5        |          |            | 0.75     |            |          | 1          |          |          |
|                                     |       | prevalence | 95% CI   |          |
| 0                                   | 0.6   | 1.70E+06   | 1.62E+06 | 1.75E+06   | 1.65E+06 | 1.59E+06   | 1.70E+06 | 1.63E+06   | 1.60E+06 | 1.67E+06   | 1.61E+06 | 1.57E+06   | 1.65E+06 | 1.54E+06   | 1.50E+06 | 1.58E+06 |
| 0.15                                | 0.529 | 1.73E+06   | 1.67E+06 | 1.77E+06   | 1.58E+06 | 1.48E+06   | 1.64E+06 | 1.64E+06   | 1.56E+06 | 1.70E+06   | 1.61E+06 | 1.57E+06   | 1.65E+06 | 1.48E+06   | 1.45E+06 | 1.51E+06 |
| 0.368                               | 0.368 | 1.66E+06   | 1.60E+06 | 1.73E+06   | 1.69E+06 | 1.63E+06   | 1.73E+06 | 1.55E+06   | 1.50E+06 | 1.58E+06   | 1.55E+06 | 1.49E+06   | 1.61E+06 | 1.52E+06   | 1.47E+06 | 1.58E+06 |
| 0.529                               | 0.15  | 1.70E+06   | 1.63E+06 | 1.75E+06   | 1.65E+06 | 1.57E+06   | 1.72E+06 | 1.58E+06   | 1.51E+06 | 1.63E+06   | 1.56E+06 | 1.49E+06   | 1.62E+06 | 1.53E+06   | 1.48E+06 | 1.57E+06 |
| 0.6                                 | 0     | 1.71E+06   | 1.65E+06 | 1.76E+06   | 1.60E+06 | 1.53E+06   | 1.65E+06 | 1.66E+06   | 1.60E+06 | 1.72E+06   | 1.56E+06 | 1.50E+06   | 1.60E+06 | 1.55E+06   | 1.47E+06 | 1.61E+06 |

  

| population vaccinated: 4.6 M (~20%) |       |            |          |            |          |            |          |            |          |            |          |            |          |            |          |          |
|-------------------------------------|-------|------------|----------|------------|----------|------------|----------|------------|----------|------------|----------|------------|----------|------------|----------|----------|
| VEs                                 | VEd   | VEI        |          |            |          |            |          |            |          |            |          |            |          |            |          |          |
|                                     |       | 0          |          |            | 0.25     |            |          | 0.5        |          |            | 0.75     |            |          | 1          |          |          |
|                                     |       | prevalence | 95% CI   |          |
| 0                                   | 0.6   | 1.51E+06   | 1.43E+06 | 1.57E+06   | 1.37E+06 | 1.32E+06   | 1.42E+06 | 1.30E+06   | 1.26E+06 | 1.35E+06   | 1.25E+06 | 1.21E+06   | 1.30E+06 | 1.17E+06   | 1.13E+06 | 1.21E+06 |
| 0.15                                | 0.529 | 1.52E+06   | 1.50E+06 | 1.55E+06   | 1.41E+06 | 1.38E+06   | 1.44E+06 | 1.36E+06   | 1.31E+06 | 1.41E+06   | 1.24E+06 | 1.19E+06   | 1.27E+06 | 1.20E+06   | 1.18E+06 | 1.23E+06 |
| 0.368                               | 0.368 | 1.45E+06   | 1.36E+06 | 1.52E+06   | 1.41E+06 | 1.38E+06   | 1.45E+06 | 1.34E+06   | 1.30E+06 | 1.39E+06   | 1.27E+06 | 1.21E+06   | 1.31E+06 | 1.18E+06   | 1.15E+06 | 1.20E+06 |
| 0.529                               | 0.15  | 1.48E+06   | 1.44E+06 | 1.53E+06   | 1.37E+06 | 1.29E+06   | 1.43E+06 | 1.38E+06   | 1.34E+06 | 1.40E+06   | 1.29E+06 | 1.27E+06   | 1.31E+06 | 1.22E+06   | 1.18E+06 | 1.25E+06 |
| 0.6                                 | 0     | 1.48E+06   | 1.42E+06 | 1.53E+06   | 1.42E+06 | 1.37E+06   | 1.47E+06 | 1.33E+06   | 1.30E+06 | 1.36E+06   | 1.30E+06 | 1.24E+06   | 1.34E+06 | 1.22E+06   | 1.18E+06 | 1.25E+06 |

  

| population vaccinated: 9.2 M (~40%) |       |            |          |            |          |            |          |            |          |            |          |            |          |            |          |          |
|-------------------------------------|-------|------------|----------|------------|----------|------------|----------|------------|----------|------------|----------|------------|----------|------------|----------|----------|
| VEs                                 | VEd   | VEI        |          |            |          |            |          |            |          |            |          |            |          |            |          |          |
|                                     |       | 0          |          |            | 0.25     |            |          | 0.5        |          |            | 0.75     |            |          | 1          |          |          |
|                                     |       | prevalence | 95% CI   |          |
| 0                                   | 0.6   | 1.13E+06   | 1.10E+06 | 1.15E+06   | 9.92E+05 | 9.77E+05   | 1.01E+06 | 8.28E+05   | 8.03E+05 | 8.50E+05   | 6.73E+05 | 6.56E+05   | 6.86E+05 | 5.30E+05   | 5.08E+05 | 5.49E+05 |
| 0.15                                | 0.529 | 1.13E+06   | 1.09E+06 | 1.16E+06   | 9.47E+05 | 9.28E+05   | 9.68E+05 | 8.22E+05   | 7.94E+05 | 8.48E+05   | 6.77E+05 | 6.55E+05   | 7.00E+05 | 5.18E+05   | 4.92E+05 | 5.44E+05 |
| 0.368                               | 0.368 | 1.07E+06   | 1.04E+06 | 1.11E+06   | 9.30E+05 | 9.17E+05   | 9.43E+05 | 8.09E+05   | 7.89E+05 | 8.28E+05   | 6.72E+05 | 6.44E+05   | 6.96E+05 | 5.57E+05   | 5.12E+05 | 5.90E+05 |
| 0.529                               | 0.15  | 1.03E+06   | 1.00E+06 | 1.06E+06   | 9.07E+05 | 8.74E+05   | 9.41E+05 | 8.04E+05   | 7.74E+05 | 8.30E+05   | 6.50E+05 | 6.19E+05   | 6.77E+05 | 5.68E+05   | 5.55E+05 | 5.86E+05 |
| 0.6                                 | 0     | 1.03E+06   | 1.01E+06 | 1.06E+06   | 9.21E+05 | 9.06E+05   | 9.41E+05 | 7.86E+05   | 7.63E+05 | 8.07E+05   | 6.77E+05 | 6.38E+05   | 6.98E+05 | 5.61E+05   | 5.40E+05 | 5.84E+05 |

  

| population vaccinated: 13.8 M (~60%) |       |            |          |            |          |            |          |            |          |            |          |            |          |            |          |          |
|--------------------------------------|-------|------------|----------|------------|----------|------------|----------|------------|----------|------------|----------|------------|----------|------------|----------|----------|
| VEs                                  | VEd   | VEI        |          |            |          |            |          |            |          |            |          |            |          |            |          |          |
|                                      |       | 0          |          |            | 0.25     |            |          | 0.5        |          |            | 0.75     |            |          | 1          |          |          |
|                                      |       | prevalence | 95% CI   |          |
| 0                                    | 0.6   | 7.82E+05   | 7.55E+05 | 8.08E+05   | 5.94E+05 | 5.77E+05   | 6.16E+05 | 4.56E+05   | 4.46E+05 | 4.66E+05   | 2.94E+05 | 2.80E+05   | 3.09E+05 | 2.01E+05   | 1.86E+05 | 2.10E+05 |
| 0.15                                 | 0.529 | 7.57E+05   | 7.39E+05 | 7.73E+05   | 5.84E+05 | 5.60E+05   | 6.09E+05 | 4.17E+05   | 3.95E+05 | 4.39E+05   | 2.98E+05 | 2.91E+05   | 3.05E+05 | 2.02E+05   | 1.88E+05 | 2.13E+05 |
| 0.368                                | 0.368 | 7.15E+05   | 6.85E+05 | 7.42E+05   | 5.45E+05 | 5.35E+05   | 5.59E+05 | 4.02E+05   | 3.88E+05 | 4.16E+05   | 2.92E+05 | 2.79E+05   | 3.07E+05 | 2.10E+05   | 1.96E+05 | 2.21E+05 |
| 0.529                                | 0.15  | 6.68E+05   | 6.48E+05 | 6.87E+05   | 5.38E+05 | 5.21E+05   | 5.51E+05 | 3.95E+05   | 3.80E+05 | 4.12E+05   | 2.91E+05 | 2.74E+05   | 3.04E+05 | 2.20E+05   | 2.09E+05 | 2.30E+05 |
| 0.6                                  | 0     | 6.51E+05   | 6.32E+05 | 6.69E+05   | 4.92E+05 | 4.60E+05   | 5.14E+05 | 3.95E+05   | 3.85E+05 | 4.06E+05   | 2.82E+05 | 2.65E+05   | 2.97E+05 | 2.05E+05   | 1.92E+05 | 2.17E+05 |

  

| population vaccinated: 18.4 M (~80%) |       |            |          |            |          |            |          |            |          |            |          |            |          |            |          |          |
|--------------------------------------|-------|------------|----------|------------|----------|------------|----------|------------|----------|------------|----------|------------|----------|------------|----------|----------|
| VEs                                  | VEd   | VEI        |          |            |          |            |          |            |          |            |          |            |          |            |          |          |
|                                      |       | 0          |          |            | 0.25     |            |          | 0.5        |          |            | 0.75     |            |          | 1          |          |          |
|                                      |       | prevalence | 95% CI   |          |
| 0                                    | 0.6   | 4.93E+05   | 4.69E+05 | 5.10E+05   | 3.40E+05 | 3.31E+05   | 3.50E+05 | 2.12E+05   | 1.99E+05 | 2.22E+05   | 1.20E+05 | 1.15E+05   | 1.26E+05 | 3.30E+04   | 2.72E+04 | 3.97E+04 |
| 0.15                                 | 0.529 | 4.81E+05   | 4.61E+05 | 5.00E+05   | 3.08E+05 | 2.83E+05   | 3.24E+05 | 2.05E+05   | 1.97E+05 | 2.12E+05   | 1.11E+05 | 1.04E+05   | 1.19E+05 | 2.90E+04   | 2.25E+04 | 3.63E+04 |
| 0.368                                | 0.368 | 4.28E+05   | 4.20E+05 | 4.35E+05   | 2.83E+05 | 2.67E+05   | 2.97E+05 | 2.01E+05   | 1.95E+05 | 2.08E+05   | 1.03E+05 | 9.16E+04   | 1.13E+05 | 3.80E+04   | 3.11E+04 | 4.58E+04 |
| 0.529                                | 0.15  | 3.95E+05   | 3.86E+05 | 4.04E+05   | 2.61E+05 | 2.51E+05   | 2.70E+05 | 1.74E+05   | 1.68E+05 | 1.81E+05   | 1.03E+05 | 8.95E+04   | 1.11E+05 | 3.10E+04   | 2.40E+04 | 3.64E+04 |
| 0.6                                  | 0     | 3.63E+05   | 3.52E+05 | 3.72E+05   | 2.62E+05 | 2.53E+05   | 2.71E+05 | 1.57E+05   | 1.46E+05 | 1.66E+05   | 1.10E+05 | 1.05E+05   | 1.16E+05 | 3.30E+04   | 2.80E+04 | 3.84E+04 |

  

| population vaccinated: 23 M (~100%) |       |            |          |            |        |            |        |            |        |            |        |            |        |            |        |      |
|-------------------------------------|-------|------------|----------|------------|--------|------------|--------|------------|--------|------------|--------|------------|--------|------------|--------|------|
| VEs                                 | VEd   | VEI        |          |            |        |            |        |            |        |            |        |            |        |            |        |      |
|                                     |       | 0          |          |            | 0.25   |            |        | 0.5        |        |            | 0.75   |            |        | 1          |        |      |
|                                     |       | prevalence | 95% CI   | prevalence | 95% CI | prevalence | 95% CI | prevalence | 95% CI | prevalence | 95% CI | prevalence | 95% CI | prevalence | 95% CI |      |
| 0                                   | 0.6   | 4.25E+03   | 3.83E+03 | 4.75E+03   | 737    | 591        | 896    | 134        | 113    | 154        | 44     | 36         | 51     | 19         | 15     | 23.7 |
| 0.15                                | 0.529 | 5.31E+03   | 4.43E+03 | 6.26E+03   | 979    | 801        | 1147   | 142        | 123    | 162        | 52     | 47         | 61     | 20         | 17     | 23.6 |
| 0.368                               | 0.368 | 4.54E+03   | 3.92E+03 | 5.33E+03   | 761    | 675        | 821    | 133        | 112    | 159        | 38     | 33         | 44     | 20         | 17     | 22.7 |
| 0.529                               | 0.15  | 4.62E+03   | 3.69E+03 | 5.33E+03   | 895    | 777        | 1010   | 141        | 113    | 169        | 43     | 38         | 49     | 18         | 16     | 20.3 |
| 0.6                                 | 0     | 4.51E+03   | 3.77E+03 | 5.43E+03   | 810    | 684        | 936    | 151        | 131    | 170        | 47     | 42         | 52     | 17         | 15     | 19.5 |

Table S6: Mean peak prevalence values and 95% ensemble bootstrap CIs produced by the ABM for various combinations of vaccine efficacy parameters and coverage levels, assuming a clinical efficacy of VEc = 0.6 and no case-targeted NPIs (n = 10 instances per scenario).

**General Vaccination Only (no case-targeted NPIs), VEc = 0.6**

**population vaccinated: 2.3 M (~10%)**

|       |       | VEi         |             |             |             |             |             |             |             |             |             |
|-------|-------|-------------|-------------|-------------|-------------|-------------|-------------|-------------|-------------|-------------|-------------|
| VEs   | VEd   | 0           |             | 0.25        |             | 0.5         |             | 0.75        |             | 1           |             |
|       |       | day of peak | 95% CI      |
| 0     | 0.6   | 121         | 119.6 121.5 | 121         | 120.4 122.0 | 123         | 121.6 125.3 | 124         | 121.3 126.6 | 123         | 121.4 124.7 |
| 0.15  | 0.529 | 120         | 117.8 121.0 | 121         | 118.1 123.3 | 122         | 120.7 122.3 | 122         | 120.7 123.7 | 124         | 122.5 126.6 |
| 0.368 | 0.368 | 121         | 120.2 121.8 | 122         | 120.3 123.5 | 121         | 120.0 121.3 | 124         | 121.9 126.4 | 124         | 121.7 126.1 |
| 0.529 | 0.15  | 121         | 119.8 123.0 | 122         | 120.8 123.8 | 124         | 122.4 126.1 | 125         | 122.7 126.5 | 124         | 122.8 126.0 |
| 0.6   | 0     | 121         | 120.2 121.6 | 124         | 120.9 126.7 | 123         | 121.7 125.1 | 123         | 121.4 124.3 | 125         | 122.5 127.3 |

**population vaccinated: 4.6 M (~20%)**

|       |       | VEi         |             |             |             |             |             |             |             |             |             |
|-------|-------|-------------|-------------|-------------|-------------|-------------|-------------|-------------|-------------|-------------|-------------|
| VEs   | VEd   | 0           |             | 0.25        |             | 0.5         |             | 0.75        |             | 1           |             |
|       |       | day of peak | 95% CI      |
| 0     | 0.6   | 124         | 122.4 125.6 | 126         | 123.6 127.4 | 128         | 126.1 131.2 | 130         | 128.9 130.0 | 132         | 130.0 133.7 |
| 0.15  | 0.529 | 124         | 122.4 126.1 | 126         | 124.0 128.3 | 126         | 124.0 127.7 | 128         | 125.8 128.8 | 129         | 125.9 130.5 |
| 0.368 | 0.368 | 124         | 121.8 126.7 | 125         | 122.9 126.7 | 128         | 125.6 129.4 | 127         | 124.6 130.4 | 130         | 128.5 131.2 |
| 0.529 | 0.15  | 125         | 123.0 126.7 | 127         | 124.3 128.3 | 129         | 127.3 131.2 | 129         | 126.5 130.4 | 131         | 129.8 132.8 |
| 0.6   | 0     | 124         | 122.5 125.5 | 126         | 124.2 128.4 | 128         | 125.7 130.4 | 130         | 128.5 133.0 | 130         | 128.7 132.7 |

**population vaccinated: 9.2 M (~40%)**

|       |       | VEi         |             |             |             |             |             |             |             |             |             |
|-------|-------|-------------|-------------|-------------|-------------|-------------|-------------|-------------|-------------|-------------|-------------|
| VEs   | VEd   | 0           |             | 0.25        |             | 0.5         |             | 0.75        |             | 1           |             |
|       |       | day of peak | 95% CI      |
| 0     | 0.6   | 127         | 124.6 128.4 | 133         | 130.5 135.5 | 138         | 134.6 140.2 | 145         | 141.7 148.2 | 152         | 148.7 155.9 |
| 0.15  | 0.529 | 130         | 127.6 132.8 | 134         | 131.3 135.8 | 139         | 136.4 141.7 | 145         | 143.0 147.2 | 150         | 147.8 152.3 |
| 0.368 | 0.368 | 134         | 132.1 135.7 | 137         | 136.4 137.6 | 141         | 138.9 142.9 | 147         | 145.4 149.0 | 152         | 147.6 157.0 |
| 0.529 | 0.15  | 135         | 132.4 137.9 | 141         | 138.3 143.2 | 143         | 140.4 144.6 | 150         | 145.3 154.2 | 151         | 148.0 152.6 |
| 0.6   | 0     | 136         | 134.7 137.3 | 138         | 135.4 139.7 | 144         | 141.1 146.7 | 147         | 145.4 149.0 | 154         | 151.6 158.1 |

**population vaccinated: 13.8 M (~60%)**

|       |       | VEi         |             |             |             |             |             |             |             |             |             |
|-------|-------|-------------|-------------|-------------|-------------|-------------|-------------|-------------|-------------|-------------|-------------|
| VEs   | VEd   | 0           |             | 0.25        |             | 0.5         |             | 0.75        |             | 1           |             |
|       |       | day of peak | 95% CI      |
| 0     | 0.6   | 133         | 130.2 137.7 | 141         | 138.6 143.0 | 149         | 146.3 151.0 | 161         | 157.7 165.1 | 180         | 173.6 186.1 |
| 0.15  | 0.529 | 137         | 134.8 138.3 | 144         | 142.4 145.3 | 154         | 150.2 158.2 | 167         | 162.2 172.3 | 185         | 180.7 188.9 |
| 0.368 | 0.368 | 144         | 141.4 146.5 | 153         | 149.5 155.7 | 156         | 154.3 158.7 | 167         | 161.9 172.6 | 182         | 177.5 185.6 |
| 0.529 | 0.15  | 148         | 145.9 150.2 | 151         | 148.9 153.0 | 160         | 155.4 163.8 | 167         | 163.5 171.3 | 179         | 174.1 183.8 |
| 0.6   | 0     | 146         | 145.3 147.9 | 153         | 150.2 154.7 | 162         | 161.2 161.8 | 169         | 164.6 176.3 | 182         | 179.2 185.8 |

**population vaccinated: 18.4 M (~80%)**

|       |       | VEi         |             |             |             |             |             |             |             |             |             |
|-------|-------|-------------|-------------|-------------|-------------|-------------|-------------|-------------|-------------|-------------|-------------|
| VEs   | VEd   | 0           |             | 0.25        |             | 0.5         |             | 0.75        |             | 1           |             |
|       |       | day of peak | 95% CI      |
| 0     | 0.6   | 138         | 134.8 140.9 | 153         | 149.1 156.1 | 169         | 163.1 176.5 | 186         | 182.7 189.8 | 195         | 195.0 195.0 |
| 0.15  | 0.529 | 145         | 143.5 147.3 | 156         | 153.3 157.9 | 169         | 165.8 172.2 | 190         | 187.8 192.6 | 195         | 195.0 195.0 |
| 0.368 | 0.368 | 153         | 149.5 155.8 | 165         | 162.9 167.7 | 177         | 174.0 179.0 | 193         | 191.5 194.5 | 195         | 195.0 195.0 |
| 0.529 | 0.15  | 160         | 157.1 162.7 | 173         | 169.6 177.3 | 181         | 176.1 186.0 | 195         | 194.3 194.9 | 195         | 195.0 195.0 |
| 0.6   | 0     | 163         | 159.7 167.0 | 169         | 166.3 172.4 | 188         | 183.6 191.3 | 194         | 191.7 194.6 | 195         | 195.0 195.0 |

**population vaccinated: 23 M (~100%)**

|       |       | VEi         |         |             |             |             |                 |             |             |             |             |
|-------|-------|-------------|---------|-------------|-------------|-------------|-----------------|-------------|-------------|-------------|-------------|
| VEs   | VEd   | 0           |         | 0.25        |             | 0.5         |                 | 0.75        |             | 1           |             |
|       |       | day of peak | 95% CI  | day of peak | 95% CI      | day of peak | 95% CI          | day of peak | 95% CI      | day of peak | 95% CI      |
| 0     | 0.6   | 195         | 195 195 | 195         | 194.7 195   | 195         | 191.9 186.3 194 | 176.9       | 167.8 185.1 | 150         | 125.3 172.7 |
| 0.15  | 0.529 | 195         | 195 195 | 195         | 194.6 195   | 189.6       | 186.9 192       | 183.7       | 177.3 189.4 | 136         | 114.3 159.7 |
| 0.368 | 0.368 | 195         | 195 195 | 195         | 194.4 194.9 | 189.1       | 182.1 193       | 160.4       | 144.5 174.8 | 153         | 137.9 167.2 |
| 0.529 | 0.15  | 195         | 195 195 | 195         | 194.5 195   | 187.7       | 182.2 192       | 179.6       | 166.2 189.9 | 143         | 111.2 169.3 |
| 0.6   | 0     | 195         | 195 195 | 195         | 194.5 195   | 190.9       | 187.6 193       | 168.8       | 153.4 180.9 | 150         | 123.8 174.2 |

Table S7: Prevalence peak times (means and 95% ensemble bootstrap CIs) produced by the ABM for various combinations of vaccine efficacy parameters and coverage levels, assuming a clinical efficacy of VEc = 0.6 and no case-targeted NPIs (n = 10 instances per scenario).

**Priority Vaccination Only (no case-targeted NPIs), VEC = 0.9**

| population vaccinated: 2.3 M (~10%) |       |             |          |             |          |             |          |             |          |             |          |          |          |          |          |          |
|-------------------------------------|-------|-------------|----------|-------------|----------|-------------|----------|-------------|----------|-------------|----------|----------|----------|----------|----------|----------|
| VEs                                 | Ved   | VEi         |          |             |          |             |          |             |          |             |          |          |          |          |          |          |
|                                     |       | 0           |          | 0.25        |          | 0.5         |          | 0.75        |          | 1           |          |          |          |          |          |          |
|                                     |       | growth rate | 95% CI   |          |          |          |          |          |
| 0                                   | 0.9   | 1.32E-01    | 1.27E-01 | 1.37E-01    | 1.32E-01 | 1.29E-01    | 1.37E-01 | 1.30E-01    | 1.25E-01 | 1.35E-01    | 1.27E-01 | 1.24E-01 | 1.30E-01 | 1.28E-01 | 1.26E-01 | 1.31E-01 |
| 0.225                               | 0.871 | 1.34E-01    | 1.30E-01 | 1.38E-01    | 1.29E-01 | 1.27E-01    | 1.32E-01 | 1.29E-01    | 1.27E-01 | 1.31E-01    | 1.30E-01 | 1.27E-01 | 1.32E-01 | 1.30E-01 | 1.26E-01 | 1.34E-01 |
| 0.684                               | 0.684 | 1.27E-01    | 1.24E-01 | 1.30E-01    | 1.29E-01 | 1.25E-01    | 1.33E-01 | 1.31E-01    | 1.28E-01 | 1.34E-01    | 1.24E-01 | 1.22E-01 | 1.28E-01 | 1.27E-01 | 1.23E-01 | 1.31E-01 |
| 0.871                               | 0.225 | 1.29E-01    | 1.24E-01 | 1.34E-01    | 1.26E-01 | 1.21E-01    | 1.30E-01 | 1.29E-01    | 1.24E-01 | 1.33E-01    | 1.28E-01 | 1.24E-01 | 1.31E-01 | 1.24E-01 | 1.21E-01 | 1.27E-01 |
| 0.9                                 | 0     | 1.26E-01    | 1.23E-01 | 1.30E-01    | 1.28E-01 | 1.24E-01    | 1.33E-01 | 1.31E-01    | 1.27E-01 | 1.37E-01    | 1.25E-01 | 1.23E-01 | 1.28E-01 | 1.24E-01 | 1.21E-01 | 1.28E-01 |

  

| population vaccinated: 4.6 M (~20%) |       |             |          |             |          |             |          |             |          |             |          |          |          |          |          |          |
|-------------------------------------|-------|-------------|----------|-------------|----------|-------------|----------|-------------|----------|-------------|----------|----------|----------|----------|----------|----------|
| VEs                                 | Ved   | VEi         |          |             |          |             |          |             |          |             |          |          |          |          |          |          |
|                                     |       | 0           |          | 0.25        |          | 0.5         |          | 0.75        |          | 1           |          |          |          |          |          |          |
|                                     |       | growth rate | 95% CI   |          |          |          |          |          |
| 0                                   | 0.9   | 1.29E-01    | 1.24E-01 | 1.34E-01    | 1.25E-01 | 1.23E-01    | 1.28E-01 | 1.25E-01    | 1.22E-01 | 1.29E-01    | 1.28E-01 | 1.23E-01 | 1.32E-01 | 1.18E-01 | 1.14E-01 | 1.23E-01 |
| 0.225                               | 0.871 | 1.27E-01    | 1.23E-01 | 1.31E-01    | 1.25E-01 | 1.22E-01    | 1.29E-01 | 1.27E-01    | 1.23E-01 | 1.31E-01    | 1.22E-01 | 1.18E-01 | 1.25E-01 | 1.24E-01 | 1.21E-01 | 1.26E-01 |
| 0.684                               | 0.684 | 1.22E-01    | 1.20E-01 | 1.25E-01    | 1.22E-01 | 1.18E-01    | 1.25E-01 | 1.22E-01    | 1.17E-01 | 1.27E-01    | 1.23E-01 | 1.19E-01 | 1.27E-01 | 1.21E-01 | 1.17E-01 | 1.25E-01 |
| 0.871                               | 0.225 | 1.23E-01    | 1.17E-01 | 1.29E-01    | 1.23E-01 | 1.20E-01    | 1.27E-01 | 1.21E-01    | 1.17E-01 | 1.24E-01    | 1.23E-01 | 1.19E-01 | 1.27E-01 | 1.19E-01 | 1.16E-01 | 1.22E-01 |
| 0.9                                 | 0     | 1.21E-01    | 1.18E-01 | 1.24E-01    | 1.21E-01 | 1.17E-01    | 1.24E-01 | 1.23E-01    | 1.20E-01 | 1.25E-01    | 1.21E-01 | 1.15E-01 | 1.27E-01 | 1.24E-01 | 1.21E-01 | 1.27E-01 |

  

| population vaccinated: 9.2 M (~40%) |       |             |          |             |          |             |          |             |          |             |          |          |          |          |          |          |
|-------------------------------------|-------|-------------|----------|-------------|----------|-------------|----------|-------------|----------|-------------|----------|----------|----------|----------|----------|----------|
| VEs                                 | Ved   | VEi         |          |             |          |             |          |             |          |             |          |          |          |          |          |          |
|                                     |       | 0           |          | 0.25        |          | 0.5         |          | 0.75        |          | 1           |          |          |          |          |          |          |
|                                     |       | growth rate | 95% CI   |          |          |          |          |          |
| 0                                   | 0.9   | 1.20E-01    | 1.18E-01 | 1.23E-01    | 1.15E-01 | 1.12E-01    | 1.18E-01 | 1.09E-01    | 1.08E-01 | 1.12E-01    | 1.06E-01 | 1.02E-01 | 1.09E-01 | 1.04E-01 | 1.01E-01 | 1.07E-01 |
| 0.225                               | 0.871 | 1.19E-01    | 1.15E-01 | 1.25E-01    | 1.14E-01 | 1.11E-01    | 1.16E-01 | 1.08E-01    | 1.06E-01 | 1.12E-01    | 1.06E-01 | 1.03E-01 | 1.08E-01 | 9.77E-02 | 9.43E-02 | 1.01E-01 |
| 0.684                               | 0.684 | 1.12E-01    | 1.09E-01 | 1.15E-01    | 1.06E-01 | 1.02E-01    | 1.10E-01 | 1.04E-01    | 1.00E-01 | 1.07E-01    | 9.98E-02 | 9.60E-02 | 1.03E-01 | 9.81E-02 | 9.42E-02 | 1.03E-01 |
| 0.871                               | 0.225 | 1.04E-01    | 1.02E-01 | 1.07E-01    | 1.06E-01 | 1.04E-01    | 1.09E-01 | 1.03E-01    | 9.92E-02 | 1.07E-01    | 1.01E-01 | 9.79E-02 | 1.05E-01 | 1.03E-01 | 9.99E-02 | 1.05E-01 |
| 0.9                                 | 0     | 1.06E-01    | 1.03E-01 | 1.10E-01    | 1.01E-01 | 9.83E-02    | 1.04E-01 | 1.04E-01    | 9.94E-02 | 1.07E-01    | 1.03E-01 | 9.96E-02 | 1.06E-01 | 9.98E-02 | 9.79E-02 | 1.02E-01 |

  

| population vaccinated: 13.8 M (~60%) |       |             |          |             |          |             |          |             |          |             |          |          |          |          |          |          |
|--------------------------------------|-------|-------------|----------|-------------|----------|-------------|----------|-------------|----------|-------------|----------|----------|----------|----------|----------|----------|
| VEs                                  | Ved   | VEi         |          |             |          |             |          |             |          |             |          |          |          |          |          |          |
|                                      |       | 0           |          | 0.25        |          | 0.5         |          | 0.75        |          | 1           |          |          |          |          |          |          |
|                                      |       | growth rate | 95% CI   |          |          |          |          |          |
| 0                                    | 0.9   | 1.14E-01    | 1.09E-01 | 1.19E-01    | 1.02E-01 | 9.85E-02    | 1.06E-01 | 9.50E-02    | 9.30E-02 | 9.70E-02    | 8.57E-02 | 8.20E-02 | 8.93E-02 | 7.89E-02 | 6.77E-02 | 8.14E-02 |
| 0.225                                | 0.871 | 1.05E-01    | 1.03E-01 | 1.07E-01    | 9.89E-02 | 9.59E-02    | 1.02E-01 | 9.15E-02    | 8.98E-02 | 9.33E-02    | 8.95E-02 | 8.67E-02 | 9.19E-02 | 7.86E-02 | 7.54E-02 | 8.21E-02 |
| 0.684                                | 0.684 | 9.18E-02    | 8.96E-02 | 9.37E-02    | 8.72E-02 | 8.32E-02    | 9.07E-02 | 8.55E-02    | 8.24E-02 | 8.98E-02    | 8.13E-02 | 7.83E-02 | 8.42E-02 | 7.54E-02 | 7.27E-02 | 7.80E-02 |
| 0.871                                | 0.225 | 8.65E-02    | 8.51E-02 | 8.79E-02    | 8.24E-02 | 7.95E-02    | 8.52E-02 | 8.25E-02    | 8.05E-02 | 8.47E-02    | 7.74E-02 | 7.48E-02 | 8.00E-02 | 7.69E-02 | 7.39E-02 | 7.98E-02 |
| 0.9                                  | 0     | 8.13E-02    | 7.91E-02 | 8.34E-02    | 8.34E-02 | 8.09E-02    | 8.57E-02 | 7.98E-02    | 7.76E-02 | 8.27E-02    | 8.00E-02 | 7.80E-02 | 8.22E-02 | 7.61E-02 | 7.37E-02 | 7.88E-02 |

  

| population vaccinated: 18.4 M (~80%) |       |             |          |             |          |             |          |             |          |             |          |          |          |          |          |          |
|--------------------------------------|-------|-------------|----------|-------------|----------|-------------|----------|-------------|----------|-------------|----------|----------|----------|----------|----------|----------|
| VEs                                  | Ved   | VEi         |          |             |          |             |          |             |          |             |          |          |          |          |          |          |
|                                      |       | 0           |          | 0.25        |          | 0.5         |          | 0.75        |          | 1           |          |          |          |          |          |          |
|                                      |       | growth rate | 95% CI   |          |          |          |          |          |
| 0                                    | 0.9   | 1.06E-01    | 1.02E-01 | 1.09E-01    | 9.31E-02 | 9.00E-02    | 9.73E-02 | 8.11E-02    | 7.85E-02 | 8.35E-02    | 6.44E-02 | 6.25E-02 | 6.61E-02 | 4.99E-02 | 4.68E-02 | 5.26E-02 |
| 0.225                                | 0.871 | 9.37E-02    | 9.07E-02 | 9.68E-02    | 8.67E-02 | 8.36E-02    | 8.97E-02 | 7.47E-02    | 7.31E-02 | 7.64E-02    | 6.37E-02 | 6.14E-02 | 6.57E-02 | 5.01E-02 | 4.85E-02 | 5.17E-02 |
| 0.684                                | 0.684 | 7.34E-02    | 7.09E-02 | 7.57E-02    | 6.98E-02 | 6.82E-02    | 7.11E-02 | 6.24E-02    | 6.08E-02 | 6.45E-02    | 6.05E-02 | 5.88E-02 | 6.22E-02 | 5.02E-02 | 4.74E-02 | 5.26E-02 |
| 0.871                                | 0.225 | 6.42E-02    | 6.27E-02 | 6.62E-02    | 5.95E-02 | 5.72E-02    | 6.24E-02 | 5.66E-02    | 5.40E-02 | 5.85E-02    | 5.59E-02 | 5.46E-02 | 5.73E-02 | 5.03E-02 | 4.71E-02 | 5.29E-02 |
| 0.9                                  | 0     | 6.27E-02    | 6.09E-02 | 6.47E-02    | 5.85E-02 | 5.64E-02    | 6.04E-02 | 5.67E-02    | 5.52E-02 | 5.80E-02    | 5.34E-02 | 5.21E-02 | 5.50E-02 | 4.86E-02 | 4.53E-02 | 5.16E-02 |

  

| population vaccinated: 23 M (~100%) |       |             |          |             |          |             |          |             |          |             |          |          |          |          |          |          |
|-------------------------------------|-------|-------------|----------|-------------|----------|-------------|----------|-------------|----------|-------------|----------|----------|----------|----------|----------|----------|
| VEs                                 | Ved   | VEi         |          |             |          |             |          |             |          |             |          |          |          |          |          |          |
|                                     |       | 0           |          | 0.25        |          | 0.5         |          | 0.75        |          | 1           |          |          |          |          |          |          |
|                                     |       | growth rate | 95% CI   |          |          |          |          |          |
| 0                                   | 0.9   | 3.32E-03    | 2.74E-03 | 3.89E-03    | 1.54E-03 | 1.13E-03    | 1.93E-03 | 4.64E-05    | 2.08E-11 | 1.39E-04    | 4.35E-11 | 1.10E-11 | 8.36E-11 | 2.29E-11 | 1.74E-12 | 5.51E-11 |
| 0.225                               | 0.871 | 3.45E-03    | 3.11E-03 | 3.83E-03    | 1.50E-03 | 9.89E-04    | 1.94E-03 | 8.81E-05    | 2.87E-11 | 3.52E-04    | 5.57E-12 | 7.96E-13 | 1.67E-11 | 1.39E-11 | 2.68E-12 | 3.01E-11 |
| 0.684                               | 0.684 | 2.94E-03    | 2.60E-03 | 3.27E-03    | 1.77E-03 | 1.33E-03    | 2.35E-03 | 3.61E-05    | 3.81E-11 | 1.20E-04    | 1.01E-11 | 3.97E-12 | 1.89E-11 | 1.41E-11 | 3.09E-12 | 3.58E-11 |
| 0.871                               | 0.225 | 3.38E-03    | 3.01E-03 | 3.63E-03    | 1.78E-03 | 1.24E-03    | 2.33E-03 | 9.90E-11    | 1.77E-11 | 2.19E-10    | 3.28E-12 | 7.62E-13 | 7.89E-12 | 4.25E-12 | 9.34E-13 | 9.63E-12 |
| 0.9                                 | 0     | 3.55E-03    | 3.34E-03 | 3.78E-03    | 2.01E-03 | 1.45E-03    | 2.70E-03 | 7.28E-05    | 7.34E-11 | 2.91E-04    | 2.84E-12 | 2.83E-13 | 7.32E-12 | 3.02E-11 | 7.49E-12 | 6.07E-11 |

Table S8: Mean incidence growth rate values and 95% ensemble bootstrap CIs produced by the ABM for various combinations of vaccine efficacy parameters and coverage levels, assuming a clinical efficacy of VEC = 0.9 and no case-targeted NPIs (n = 10 instances per scenario).



**Priority Vaccination Only (no case-targeted NPIs), VEc = 0.9**

| population vaccinated: 2.3 M (~10%) |       |            |          |            |          |            |          |            |          |            |          |            |          |            |          |          |
|-------------------------------------|-------|------------|----------|------------|----------|------------|----------|------------|----------|------------|----------|------------|----------|------------|----------|----------|
| VEs                                 | VEd   | VEI        |          |            |          |            |          |            |          |            |          |            |          |            |          |          |
|                                     |       | 0          |          |            | 0.25     |            |          | 0.5        |          |            | 0.75     |            |          | 1          |          |          |
|                                     |       | prevalence | 95% CI   |          |
| 0                                   | 0.9   | 1.63E+06   | 1.56E+06 | 1.70E+06   | 1.56E+06 | 1.51E+06   | 1.61E+06 | 1.51E+06   | 1.48E+06 | 1.55E+06   | 1.55E+06 | 1.51E+06   | 1.60E+06 | 1.51E+06   | 1.47E+06 | 1.54E+06 |
| 0.225                               | 0.871 | 1.62E+06   | 1.55E+06 | 1.66E+06   | 1.57E+06 | 1.52E+06   | 1.61E+06 | 1.54E+06   | 1.48E+06 | 1.61E+06   | 1.51E+06 | 1.43E+06   | 1.58E+06 | 1.48E+06   | 1.39E+06 | 1.56E+06 |
| 0.684                               | 0.684 | 1.60E+06   | 1.56E+06 | 1.64E+06   | 1.57E+06 | 1.50E+06   | 1.61E+06 | 1.54E+06   | 1.48E+06 | 1.60E+06   | 1.52E+06 | 1.46E+06   | 1.58E+06 | 1.46E+06   | 1.41E+06 | 1.51E+06 |
| 0.871                               | 0.225 | 1.55E+06   | 1.49E+06 | 1.60E+06   | 1.53E+06 | 1.46E+06   | 1.58E+06 | 1.45E+06   | 1.38E+06 | 1.50E+06   | 1.52E+06 | 1.46E+06   | 1.57E+06 | 1.47E+06   | 1.41E+06 | 1.53E+06 |
| 0.9                                 | 0     | 1.55E+06   | 1.51E+06 | 1.58E+06   | 1.53E+06 | 1.50E+06   | 1.58E+06 | 1.47E+06   | 1.42E+06 | 1.51E+06   | 1.49E+06 | 1.46E+06   | 1.53E+06 | 1.51E+06   | 1.46E+06 | 1.56E+06 |

  

| population vaccinated: 4.6 M (~20%) |       |            |          |            |          |            |          |            |          |            |          |            |          |            |          |          |
|-------------------------------------|-------|------------|----------|------------|----------|------------|----------|------------|----------|------------|----------|------------|----------|------------|----------|----------|
| VEs                                 | VEd   | VEI        |          |            |          |            |          |            |          |            |          |            |          |            |          |          |
|                                     |       | 0          |          |            | 0.25     |            |          | 0.5        |          |            | 0.75     |            |          | 1          |          |          |
|                                     |       | prevalence | 95% CI   |          |
| 0                                   | 0.9   | 1.32E+06   | 1.29E+06 | 1.34E+06   | 1.27E+06 | 1.19E+06   | 1.33E+06 | 1.19E+06   | 1.13E+06 | 1.25E+06   | 1.13E+06 | 1.08E+06   | 1.17E+06 | 1.01E+06   | 9.81E+05 | 1.05E+06 |
| 0.225                               | 0.871 | 1.25E+06   | 1.23E+06 | 1.29E+06   | 1.23E+06 | 1.19E+06   | 1.28E+06 | 1.19E+06   | 1.15E+06 | 1.23E+06   | 1.15E+06 | 1.12E+06   | 1.18E+06 | 1.11E+06   | 1.05E+06 | 1.15E+06 |
| 0.684                               | 0.684 | 1.25E+06   | 1.22E+06 | 1.28E+06   | 1.16E+06 | 1.12E+06   | 1.19E+06 | 1.17E+06   | 1.11E+06 | 1.21E+06   | 1.11E+06 | 1.07E+06   | 1.15E+06 | 1.06E+06   | 1.02E+06 | 1.09E+06 |
| 0.871                               | 0.225 | 1.16E+06   | 1.11E+06 | 1.21E+06   | 1.13E+06 | 1.08E+06   | 1.17E+06 | 1.12E+06   | 1.07E+06 | 1.16E+06   | 1.13E+06 | 1.11E+06   | 1.16E+06 | 1.04E+06   | 9.60E+05 | 1.11E+06 |
| 0.9                                 | 0     | 1.19E+06   | 1.16E+06 | 1.22E+06   | 1.15E+06 | 1.10E+06   | 1.19E+06 | 1.19E+06   | 1.17E+06 | 1.21E+06   | 1.13E+06 | 1.08E+06   | 1.17E+06 | 1.12E+06   | 1.08E+06 | 1.16E+06 |

  

| population vaccinated: 9.2 M (~40%) |       |            |          |            |          |            |          |            |          |            |          |            |          |            |          |          |
|-------------------------------------|-------|------------|----------|------------|----------|------------|----------|------------|----------|------------|----------|------------|----------|------------|----------|----------|
| VEs                                 | VEd   | VEI        |          |            |          |            |          |            |          |            |          |            |          |            |          |          |
|                                     |       | 0          |          |            | 0.25     |            |          | 0.5        |          |            | 0.75     |            |          | 1          |          |          |
|                                     |       | prevalence | 95% CI   |          |
| 0                                   | 0.9   | 7.86E+05   | 7.58E+05 | 8.18E+05   | 6.76E+05 | 6.51E+05   | 6.97E+05 | 5.89E+05   | 5.44E+05 | 6.23E+05   | 4.98E+05 | 4.69E+05   | 5.22E+05 | 4.50E+05   | 4.33E+05 | 4.66E+05 |
| 0.225                               | 0.871 | 7.38E+05   | 7.16E+05 | 7.57E+05   | 6.36E+05 | 6.11E+05   | 6.59E+05 | 6.17E+05   | 6.03E+05 | 6.33E+05   | 5.28E+05 | 5.14E+05   | 5.43E+05 | 4.30E+05   | 4.15E+05 | 4.44E+05 |
| 0.684                               | 0.684 | 6.06E+05   | 5.85E+05 | 6.28E+05   | 5.79E+05 | 5.57E+05   | 5.99E+05 | 5.38E+05   | 5.16E+05 | 5.56E+05   | 5.01E+05 | 4.83E+05   | 5.20E+05 | 4.60E+05   | 4.44E+05 | 4.80E+05 |
| 0.871                               | 0.225 | 5.63E+05   | 5.47E+05 | 5.78E+05   | 5.40E+05 | 5.16E+05   | 5.56E+05 | 5.09E+05   | 4.83E+05 | 5.30E+05   | 4.86E+05 | 4.55E+05   | 5.09E+05 | 4.73E+05   | 4.55E+05 | 4.89E+05 |
| 0.9                                 | 0     | 5.59E+05   | 5.46E+05 | 5.71E+05   | 5.33E+05 | 5.07E+05   | 5.58E+05 | 5.06E+05   | 4.80E+05 | 5.27E+05   | 4.79E+05 | 4.53E+05   | 5.02E+05 | 4.73E+05   | 4.51E+05 | 4.89E+05 |

  

| population vaccinated: 13.8 M (~60%) |       |            |          |            |          |            |          |            |          |            |          |            |          |            |          |          |
|--------------------------------------|-------|------------|----------|------------|----------|------------|----------|------------|----------|------------|----------|------------|----------|------------|----------|----------|
| VEs                                  | VEd   | VEI        |          |            |          |            |          |            |          |            |          |            |          |            |          |          |
|                                      |       | 0          |          |            | 0.25     |            |          | 0.5        |          |            | 0.75     |            |          | 1          |          |          |
|                                      |       | prevalence | 95% CI   |          |
| 0                                    | 0.9   | 3.97E+05   | 3.84E+05 | 4.13E+05   | 3.13E+05 | 2.99E+05   | 3.25E+05 | 2.53E+05   | 2.41E+05 | 2.63E+05   | 1.92E+05 | 1.84E+05   | 2.00E+05 | 1.38E+05   | 1.27E+05 | 1.45E+05 |
| 0.225                                | 0.871 | 3.65E+05   | 3.55E+05 | 3.77E+05   | 2.92E+05 | 2.88E+05   | 2.98E+05 | 2.40E+05   | 2.28E+05 | 2.50E+05   | 1.86E+05 | 1.80E+05   | 1.92E+05 | 1.30E+05   | 1.19E+05 | 1.40E+05 |
| 0.684                                | 0.684 | 2.57E+05   | 2.46E+05 | 2.65E+05   | 2.25E+05 | 2.11E+05   | 2.33E+05 | 1.94E+05   | 1.86E+05 | 2.03E+05   | 1.73E+05 | 1.64E+05   | 1.80E+05 | 1.28E+05   | 1.19E+05 | 1.36E+05 |
| 0.871                                | 0.225 | 2.10E+05   | 1.98E+05 | 2.18E+05   | 1.92E+05 | 1.85E+05   | 2.00E+05 | 1.69E+05   | 1.62E+05 | 1.76E+05   | 1.73E+05 | 1.67E+05   | 1.79E+05 | 1.40E+05   | 1.35E+05 | 1.46E+05 |
| 0.9                                  | 0     | 2.02E+05   | 1.93E+05 | 2.09E+05   | 1.94E+05 | 1.83E+05   | 2.01E+05 | 1.79E+05   | 1.72E+05 | 1.85E+05   | 1.60E+05 | 1.49E+05   | 1.70E+05 | 1.49E+05   | 1.40E+05 | 1.57E+05 |

  

| population vaccinated: 18.4 M (~80%) |       |            |          |            |          |            |          |            |          |            |          |            |          |            |          |          |
|--------------------------------------|-------|------------|----------|------------|----------|------------|----------|------------|----------|------------|----------|------------|----------|------------|----------|----------|
| VEs                                  | VEd   | VEI        |          |            |          |            |          |            |          |            |          |            |          |            |          |          |
|                                      |       | 0          |          |            | 0.25     |            |          | 0.5        |          |            | 0.75     |            |          | 1          |          |          |
|                                      |       | prevalence | 95% CI   |          |
| 0                                    | 0.9   | 1.47E+05   | 1.40E+05 | 1.54E+05   | 1.12E+05 | 1.08E+05   | 1.17E+05 | 8.20E+04   | 7.83E+04 | 8.62E+04   | 5.50E+04 | 5.08E+04   | 5.96E+04 | 1.90E+04   | 1.40E+04 | 2.37E+04 |
| 0.225                                | 0.871 | 1.31E+05   | 1.27E+05 | 1.35E+05   | 9.90E+04 | 9.22E+04   | 1.05E+05 | 7.50E+04   | 7.10E+04 | 7.90E+04   | 5.40E+04 | 5.13E+04   | 5.58E+04 | 1.70E+04   | 1.44E+04 | 1.90E+04 |
| 0.684                                | 0.684 | 8.60E+04   | 8.22E+04 | 8.89E+04   | 7.00E+04 | 6.50E+04   | 7.26E+04 | 5.30E+04   | 5.04E+04 | 5.55E+04   | 4.20E+04 | 3.67E+04   | 4.72E+04 | 2.10E+04   | 1.63E+04 | 2.56E+04 |
| 0.871                                | 0.225 | 6.70E+04   | 6.29E+04 | 7.01E+04   | 5.70E+04 | 5.35E+04   | 5.91E+04 | 4.50E+04   | 3.92E+04 | 5.13E+04   | 3.40E+04 | 3.00E+04   | 3.84E+04 | 2.10E+04   | 1.64E+04 | 2.56E+04 |
| 0.9                                  | 0     | 6.10E+04   | 5.82E+04 | 6.34E+04   | 5.40E+04 | 5.16E+04   | 5.66E+04 | 4.60E+04   | 4.30E+04 | 4.99E+04   | 3.20E+04 | 2.87E+04   | 3.57E+04 | 1.80E+04   | 1.48E+04 | 2.06E+04 |

  

| population vaccinated: 23 M (~100%) |       |            |        |            |        |            |        |            |        |            |        |            |        |            |        |    |
|-------------------------------------|-------|------------|--------|------------|--------|------------|--------|------------|--------|------------|--------|------------|--------|------------|--------|----|
| VEs                                 | VEd   | VEI        |        |            |        |            |        |            |        |            |        |            |        |            |        |    |
|                                     |       | 0          |        |            | 0.25   |            |        | 0.5        |        |            | 0.75   |            |        | 1          |        |    |
|                                     |       | prevalence | 95% CI |    |
| 0                                   | 0.9   | 23         | 21     | 26         | 19     | 17         | 20     | 15         | 13     | 17         | 12     | 11         | 13     | 7          | 7      | 8  |
| 0.225                               | 0.871 | 22         | 20     | 24         | 19     | 18         | 20     | 15         | 13     | 16         | 12     | 12         | 13     | 9          | 8      | 10 |
| 0.684                               | 0.684 | 22         | 21     | 23         | 18     | 17         | 19     | 14         | 13     | 15         | 12     | 11         | 13     | 8          | 7      | 10 |
| 0.871                               | 0.225 | 21         | 20     | 22         | 18     | 17         | 19     | 15         | 15     | 16         | 12     | 11         | 13     | 8          | 7      | 8  |
| 0.9                                 | 0     | 23         | 22     | 24         | 19     | 17         | 20     | 15         | 13     | 16         | 12     | 11         | 13     | 7          | 7      | 8  |

Table S9: Mean peak prevalence values and 95% ensemble bootstrap CIs produced by the ABM for various combinations of vaccine efficacy parameters and coverage levels, assuming a clinical efficacy of VEc = 0.9 and no case-targeted NPIs (n = 10 instances per scenario).

**Priority Vaccination Only (no case-targeted NPIs), V<sub>Ec</sub> = 0.9**

**population vaccinated: 2.3 M (~10%)**

|       |       | VEI         |             |             |             |             |             |             |             |             |             |
|-------|-------|-------------|-------------|-------------|-------------|-------------|-------------|-------------|-------------|-------------|-------------|
| VEs   | VEd   | 0           |             | 0.25        |             | 0.5         |             | 0.75        |             | 1           |             |
|       |       | day of peak | 95% CI      |
| 0     | 0.9   | 121         | 119.2 121.4 | 122         | 120.9 124.1 | 124         | 122.4 125.8 | 123         | 121.4 124.7 | 123         | 121.9 124.5 |
| 0.225 | 0.871 | 121         | 118.2 123.0 | 122         | 120.6 123.8 | 123         | 121.5 123.9 | 124         | 121.8 127.9 | 123         | 120.3 124.6 |
| 0.684 | 0.684 | 122         | 121.3 123.4 | 122         | 120.7 123.6 | 122         | 119.5 123.5 | 123         | 121.7 124.5 | 125         | 122.5 126.7 |
| 0.871 | 0.225 | 122         | 120.7 124.7 | 124         | 122.5 125.8 | 127         | 124.8 128.3 | 124         | 121.4 126.6 | 124         | 121.5 126.5 |
| 0.9   | 0     | 123         | 121.6 124.5 | 121         | 119.0 123.3 | 124         | 121.6 125.9 | 124         | 122.1 125.7 | 125         | 123.4 127.3 |

**population vaccinated: 4.6 M (~20%)**

|       |       | VEI         |             |             |             |             |             |             |             |             |             |
|-------|-------|-------------|-------------|-------------|-------------|-------------|-------------|-------------|-------------|-------------|-------------|
| VEs   | VEd   | 0           |             | 0.25        |             | 0.5         |             | 0.75        |             | 1           |             |
|       |       | day of peak | 95% CI      |
| 0     | 0.9   | 123         | 121.9 125.3 | 125         | 122.8 127.6 | 128         | 126.4 128.9 | 129         | 127.1 131.5 | 131         | 128.2 133.2 |
| 0.225 | 0.871 | 125         | 122.8 126.4 | 126         | 123.9 129.4 | 127         | 124.4 128.5 | 132         | 129.7 133.7 | 130         | 128.9 131.8 |
| 0.684 | 0.684 | 127         | 124.7 128.3 | 129         | 128.0 129.0 | 130         | 127.7 132.9 | 130         | 128.5 132.3 | 129         | 127.6 131.6 |
| 0.871 | 0.225 | 128         | 126.1 130.6 | 128         | 125.3 129.1 | 130         | 127.7 132.2 | 130         | 129.4 132.2 | 129         | 126.4 131.2 |
| 0.9   | 0     | 129         | 128.2 129.6 | 130         | 127.7 131.6 | 129         | 127.8 129.2 | 130         | 128.0 132.5 | 133         | 130.5 134.5 |

**population vaccinated: 9.2 M (~40%)**

|       |       | VEI         |             |             |             |             |             |             |             |             |             |
|-------|-------|-------------|-------------|-------------|-------------|-------------|-------------|-------------|-------------|-------------|-------------|
| VEs   | VEd   | 0           |             | 0.25        |             | 0.5         |             | 0.75        |             | 1           |             |
|       |       | day of peak | 95% CI      |
| 0     | 0.9   | 133         | 130.3 136.2 | 136         | 133.3 138.8 | 140         | 138.1 142.4 | 150         | 145.8 155.6 | 151         | 148.4 154.3 |
| 0.225 | 0.871 | 134         | 132.0 136.4 | 140         | 137.8 142.1 | 141         | 138.8 143.5 | 146         | 142.9 149.5 | 154         | 150.0 157.8 |
| 0.684 | 0.684 | 143         | 140.0 144.5 | 143         | 139.7 145.8 | 146         | 143.5 148.5 | 150         | 147.5 151.9 | 152         | 149.1 156.2 |
| 0.871 | 0.225 | 143         | 140.1 145.9 | 145         | 142.5 147.3 | 150         | 146.0 154.5 | 147         | 144.4 149.7 | 151         | 148.6 153.1 |
| 0.9   | 0     | 144         | 141.0 146.7 | 144         | 141.5 145.1 | 148         | 146.3 150.5 | 152         | 147.3 156.1 | 150         | 147.9 152.5 |

**population vaccinated: 13.8 M (~60%)**

|       |       | VEI         |             |             |             |             |             |             |             |             |             |
|-------|-------|-------------|-------------|-------------|-------------|-------------|-------------|-------------|-------------|-------------|-------------|
| VEs   | VEd   | 0           |             | 0.25        |             | 0.5         |             | 0.75        |             | 1           |             |
|       |       | day of peak | 95% CI      |
| 0     | 0.9   | 141         | 138.7 143.5 | 147         | 144.1 150.3 | 156         | 152.1 159.7 | 165         | 160.9 168.4 | 178         | 172.8 183.5 |
| 0.225 | 0.871 | 147         | 143.2 151.5 | 150         | 147.3 153.4 | 158         | 154.8 162.3 | 167         | 163.1 170.9 | 182         | 177.4 187.1 |
| 0.684 | 0.684 | 160         | 157.8 162.3 | 165         | 160.4 169.0 | 164         | 160.7 167.0 | 176         | 172.1 179.4 | 180         | 175.5 184.8 |
| 0.871 | 0.225 | 163         | 158.7 169.1 | 166         | 163.7 168.4 | 170         | 165.0 175.2 | 175         | 171.5 178.1 | 181         | 176.6 185.5 |
| 0.9   | 0     | 161         | 159.0 163.3 | 165         | 160.7 170.1 | 166         | 161.9 169.8 | 176         | 171.6 181.4 | 181         | 177.6 184.3 |

**population vaccinated: 18.4 M (~80%)**

|       |       | VEI         |             |             |             |             |             |             |             |             |             |
|-------|-------|-------------|-------------|-------------|-------------|-------------|-------------|-------------|-------------|-------------|-------------|
| VEs   | VEd   | 0           |             | 0.25        |             | 0.5         |             | 0.75        |             | 1           |             |
|       |       | day of peak | 95% CI      |
| 0     | 0.9   | 148         | 144.7 151.8 | 159         | 156.0 162.0 | 174         | 169.8 178.7 | 191         | 186.6 193.1 | 195         | 195.0 195.0 |
| 0.225 | 0.871 | 154         | 151.8 156.8 | 165         | 161.2 169.0 | 179         | 175.3 182.3 | 193         | 190.1 194.3 | 195         | 194.7 195.0 |
| 0.684 | 0.684 | 181         | 177.5 185.4 | 187         | 183.9 189.9 | 193         | 191.1 194.5 | 195         | 194.5 195.0 | 195         | 194.7 195.0 |
| 0.871 | 0.225 | 193         | 190.8 193.9 | 194         | 193.5 194.3 | 194         | 193.8 194.6 | 195         | 194.5 195.0 | 195         | 195.0 195.0 |
| 0.9   | 0     | 191         | 188.6 193.4 | 194         | 193.6 194.4 | 195         | 194.2 194.8 | 195         | 194.7 195.0 | 195         | 195.0 195.0 |

**population vaccinated: 23 M (~100%)**

|       |       | VEI         |            |             |           |             |          |             |           |             |             |
|-------|-------|-------------|------------|-------------|-----------|-------------|----------|-------------|-----------|-------------|-------------|
| VEs   | VEd   | 0           |            | 0.25        |           | 0.5         |          | 0.75        |           | 1           |             |
|       |       | day of peak | 95% CI     | day of peak | 95% CI    | day of peak | 95% CI   | day of peak | 95% CI    | day of peak | 95% CI      |
| 0     | 0.9   | 105         | 87.3 125.9 | 102.8       | 74.4 133  | 74.4        | 48.8 103 | 103.8       | 75.7 131  | 103.0       | 73.6 134.31 |
| 0.225 | 0.871 | 93          | 56.2 134.3 | 100.3       | 81.0 126  | 105.3       | 81.8 130 | 96.6        | 67.1 128  | 107.8       | 77.2 137.05 |
| 0.684 | 0.684 | 71          | 56.0 91.6  | 77.5        | 51.6 107  | 109.9       | 75.7 148 | 80.6        | 61.0 106  | 88.1        | 58.8 114.6  |
| 0.871 | 0.225 | 116         | 84.8 145.2 | 110.2       | 77.8 144  | 126.3       | 92.4 156 | 126.3       | 100.9 150 | 95.0        | 63.8 124.6  |
| 0.9   | 0     | 107         | 74.2 135.7 | 139.9       | 109.9 166 | 113.1       | 82.9 144 | 117.9       | 98.7 136  | 82.2        | 57.5 109.7  |

Table S10: Prevalence peak times (means and 95% ensemble bootstrap CIs) produced by the ABM for various combinations of vaccine efficacy parameters and coverage levels, assuming a clinical efficacy of V<sub>Ec</sub> = 0.9 and no case-targeted NPIs (n = 10 instances per scenario).

General Vaccination with Case-Targeted NPIs, VEC = 0.6

| population vaccinated: 2.3 M (~10%) |       |             |          |             |          |             |          |             |          |             |          |          |          |          |          |          |
|-------------------------------------|-------|-------------|----------|-------------|----------|-------------|----------|-------------|----------|-------------|----------|----------|----------|----------|----------|----------|
| VEs                                 | Ved   | VEI         |          |             |          |             |          |             |          |             |          |          |          |          |          |          |
|                                     |       | 0           |          | 0.25        |          | 0.5         |          | 0.75        |          | 1           |          |          |          |          |          |          |
|                                     |       | growth rate | 95% CI   |          |          |          |          |          |
| 0                                   | 0.6   | 1.18E-01    | 1.16E-01 | 1.20E-01    | 1.17E-01 | 1.14E-01    | 1.21E-01 | 1.15E-01    | 1.12E-01 | 1.18E-01    | 1.12E-01 | 1.08E-01 | 1.15E-01 | 1.10E-01 | 1.07E-01 | 1.13E-01 |
| 0.15                                | 0.529 | 1.15E-01    | 1.11E-01 | 1.19E-01    | 1.14E-01 | 1.10E-01    | 1.16E-01 | 1.15E-01    | 1.11E-01 | 1.19E-01    | 1.13E-01 | 1.10E-01 | 1.17E-01 | 1.11E-01 | 1.08E-01 | 1.14E-01 |
| 0.368                               | 0.368 | 1.11E-01    | 1.07E-01 | 1.16E-01    | 1.14E-01 | 1.12E-01    | 1.17E-01 | 1.14E-01    | 1.11E-01 | 1.18E-01    | 1.12E-01 | 1.10E-01 | 1.15E-01 | 1.10E-01 | 1.07E-01 | 1.13E-01 |
| 0.529                               | 0.15  | 1.14E-01    | 1.11E-01 | 1.18E-01    | 1.14E-01 | 1.11E-01    | 1.18E-01 | 1.15E-01    | 1.11E-01 | 1.19E-01    | 1.12E-01 | 1.10E-01 | 1.14E-01 | 1.13E-01 | 1.09E-01 | 1.16E-01 |
| 0.6                                 | 0     | 1.13E-01    | 1.09E-01 | 1.17E-01    | 1.13E-01 | 1.09E-01    | 1.15E-01 | 1.10E-01    | 1.05E-01 | 1.13E-01    | 1.11E-01 | 1.08E-01 | 1.13E-01 | 1.14E-01 | 1.09E-01 | 1.18E-01 |

  

| population vaccinated: 4.6 M (~20%) |       |             |          |             |          |             |          |             |          |             |          |          |          |          |          |          |
|-------------------------------------|-------|-------------|----------|-------------|----------|-------------|----------|-------------|----------|-------------|----------|----------|----------|----------|----------|----------|
| VEs                                 | Ved   | VEI         |          |             |          |             |          |             |          |             |          |          |          |          |          |          |
|                                     |       | 0           |          | 0.25        |          | 0.5         |          | 0.75        |          | 1           |          |          |          |          |          |          |
|                                     |       | growth rate | 95% CI   |          |          |          |          |          |
| 0                                   | 0.6   | 1.12E-01    | 1.08E-01 | 1.15E-01    | 1.11E-01 | 1.09E-01    | 1.13E-01 | 1.08E-01    | 1.04E-01 | 1.10E-01    | 1.08E-01 | 1.04E-01 | 1.12E-01 | 1.07E-01 | 1.04E-01 | 1.11E-01 |
| 0.15                                | 0.529 | 1.12E-01    | 1.08E-01 | 1.15E-01    | 1.13E-01 | 1.09E-01    | 1.15E-01 | 1.08E-01    | 1.04E-01 | 1.11E-01    | 1.06E-01 | 1.01E-01 | 1.09E-01 | 1.04E-01 | 9.98E-02 | 1.09E-01 |
| 0.368                               | 0.368 | 1.11E-01    | 1.07E-01 | 1.16E-01    | 1.11E-01 | 1.08E-01    | 1.14E-01 | 1.06E-01    | 1.02E-01 | 1.09E-01    | 1.04E-01 | 1.01E-01 | 1.07E-01 | 1.06E-01 | 1.03E-01 | 1.09E-01 |
| 0.529                               | 0.15  | 1.11E-01    | 1.08E-01 | 1.16E-01    | 1.07E-01 | 1.05E-01    | 1.10E-01 | 1.05E-01    | 1.03E-01 | 1.08E-01    | 1.08E-01 | 1.05E-01 | 1.11E-01 | 1.03E-01 | 9.95E-02 | 1.06E-01 |
| 0.6                                 | 0     | 1.10E-01    | 1.07E-01 | 1.14E-01    | 1.09E-01 | 1.06E-01    | 1.11E-01 | 1.09E-01    | 1.07E-01 | 1.11E-01    | 1.03E-01 | 1.01E-01 | 1.06E-01 | 1.05E-01 | 1.03E-01 | 1.07E-01 |

  

| population vaccinated: 9.2 M (~40%) |       |             |          |             |          |             |          |             |          |             |          |          |          |          |          |          |
|-------------------------------------|-------|-------------|----------|-------------|----------|-------------|----------|-------------|----------|-------------|----------|----------|----------|----------|----------|----------|
| VEs                                 | Ved   | VEI         |          |             |          |             |          |             |          |             |          |          |          |          |          |          |
|                                     |       | 0           |          | 0.25        |          | 0.5         |          | 0.75        |          | 1           |          |          |          |          |          |          |
|                                     |       | growth rate | 95% CI   |          |          |          |          |          |
| 0                                   | 0.6   | 1.10E-01    | 1.07E-01 | 1.12E-01    | 1.05E-01 | 1.03E-01    | 1.06E-01 | 9.60E-02    | 9.39E-02 | 9.81E-02    | 9.13E-02 | 8.81E-02 | 9.45E-02 | 8.44E-02 | 8.23E-02 | 8.70E-02 |
| 0.15                                | 0.529 | 1.09E-01    | 1.07E-01 | 1.11E-01    | 1.01E-01 | 9.75E-02    | 1.05E-01 | 9.90E-02    | 9.67E-02 | 1.02E-01    | 9.12E-02 | 8.82E-02 | 9.45E-02 | 8.37E-02 | 8.08E-02 | 8.68E-02 |
| 0.368                               | 0.368 | 1.06E-01    | 1.04E-01 | 1.08E-01    | 9.85E-02 | 9.54E-02    | 1.02E-01 | 9.41E-02    | 9.26E-02 | 9.53E-02    | 9.07E-02 | 8.82E-02 | 9.30E-02 | 8.61E-02 | 8.38E-02 | 8.86E-02 |
| 0.529                               | 0.15  | 9.75E-02    | 9.59E-02 | 9.94E-02    | 9.40E-02 | 9.26E-02    | 9.56E-02 | 9.21E-02    | 8.92E-02 | 9.57E-02    | 8.66E-02 | 8.42E-02 | 8.92E-02 | 8.55E-02 | 8.24E-02 | 8.78E-02 |
| 0.6                                 | 0     | 9.95E-02    | 9.81E-02 | 1.01E-01    | 9.63E-02 | 9.41E-02    | 9.89E-02 | 8.99E-02    | 8.79E-02 | 9.20E-02    | 8.85E-02 | 8.55E-02 | 9.22E-02 | 8.44E-02 | 8.31E-02 | 8.58E-02 |

  

| population vaccinated: 13.8 M (~60%) |       |             |          |             |          |             |          |             |          |             |          |          |          |          |          |          |
|--------------------------------------|-------|-------------|----------|-------------|----------|-------------|----------|-------------|----------|-------------|----------|----------|----------|----------|----------|----------|
| VEs                                  | Ved   | VEI         |          |             |          |             |          |             |          |             |          |          |          |          |          |          |
|                                      |       | 0           |          | 0.25        |          | 0.5         |          | 0.75        |          | 1           |          |          |          |          |          |          |
|                                      |       | growth rate | 95% CI   |          |          |          |          |          |
| 0                                    | 0.6   | 1.03E-01    | 1.01E-01 | 1.05E-01    | 9.72E-02 | 9.50E-02    | 9.90E-02 | 8.76E-02    | 8.45E-02 | 9.10E-02    | 7.30E-02 | 7.11E-02 | 7.55E-02 | 6.43E-02 | 6.24E-02 | 6.63E-02 |
| 0.15                                 | 0.529 | 1.02E-01    | 1.00E-01 | 1.04E-01    | 9.31E-02 | 9.07E-02    | 9.53E-02 | 8.30E-02    | 8.16E-02 | 8.46E-02    | 7.54E-02 | 7.26E-02 | 7.84E-02 | 6.40E-02 | 6.19E-02 | 6.60E-02 |
| 0.368                                | 0.368 | 9.54E-02    | 9.36E-02 | 9.71E-02    | 8.67E-02 | 8.38E-02    | 8.94E-02 | 8.16E-02    | 7.91E-02 | 8.48E-02    | 7.10E-02 | 6.77E-02 | 7.45E-02 | 6.40E-02 | 6.22E-02 | 6.59E-02 |
| 0.529                                | 0.15  | 8.66E-02    | 8.36E-02 | 8.87E-02    | 8.42E-02 | 8.25E-02    | 8.61E-02 | 7.62E-02    | 7.52E-02 | 7.70E-02    | 6.83E-02 | 6.65E-02 | 7.00E-02 | 6.48E-02 | 6.20E-02 | 6.71E-02 |
| 0.6                                  | 0     | 8.56E-02    | 8.31E-02 | 8.83E-02    | 8.00E-02 | 7.78E-02    | 8.22E-02 | 7.70E-02    | 7.48E-02 | 7.98E-02    | 6.95E-02 | 6.76E-02 | 7.10E-02 | 6.28E-02 | 6.07E-02 | 6.51E-02 |

  

| population vaccinated: 18.4 M (~80%) |       |             |          |             |          |             |          |             |          |             |          |          |          |          |          |          |
|--------------------------------------|-------|-------------|----------|-------------|----------|-------------|----------|-------------|----------|-------------|----------|----------|----------|----------|----------|----------|
| VEs                                  | Ved   | VEI         |          |             |          |             |          |             |          |             |          |          |          |          |          |          |
|                                      |       | 0           |          | 0.25        |          | 0.5         |          | 0.75        |          | 1           |          |          |          |          |          |          |
|                                      |       | growth rate | 95% CI   |          |          |          |          |          |
| 0                                    | 0.6   | 1.03E-01    | 1.01E-01 | 1.06E-01    | 9.04E-02 | 8.87E-02    | 9.15E-02 | 7.44E-02    | 7.19E-02 | 7.74E-02    | 5.76E-02 | 5.63E-02 | 5.93E-02 | 3.74E-02 | 3.57E-02 | 3.97E-02 |
| 0.15                                 | 0.529 | 9.92E-02    | 9.80E-02 | 1.00E-01    | 8.54E-02 | 8.29E-02    | 8.87E-02 | 7.09E-02    | 6.99E-02 | 7.25E-02    | 5.55E-02 | 5.41E-02 | 5.73E-02 | 4.14E-02 | 3.99E-02 | 4.33E-02 |
| 0.368                                | 0.368 | 8.66E-02    | 8.42E-02 | 8.94E-02    | 7.65E-02 | 7.47E-02    | 7.85E-02 | 6.42E-02    | 6.16E-02 | 6.61E-02    | 5.20E-02 | 4.96E-02 | 5.42E-02 | 4.08E-02 | 3.82E-02 | 4.28E-02 |
| 0.529                                | 0.15  | 7.54E-02    | 7.36E-02 | 7.72E-02    | 7.01E-02 | 6.77E-02    | 7.28E-02 | 6.03E-02    | 5.81E-02 | 6.31E-02    | 4.97E-02 | 4.83E-02 | 5.18E-02 | 3.97E-02 | 3.69E-02 | 4.17E-02 |
| 0.6                                  | 0     | 7.29E-02    | 7.05E-02 | 7.54E-02    | 6.51E-02 | 6.33E-02    | 6.75E-02 | 5.74E-02    | 5.57E-02 | 5.93E-02    | 4.77E-02 | 4.63E-02 | 4.92E-02 | 3.99E-02 | 3.74E-02 | 4.22E-02 |

  

| population vaccinated: 23 M (~100%) |       |             |          |             |          |             |          |             |          |             |          |          |          |          |          |          |
|-------------------------------------|-------|-------------|----------|-------------|----------|-------------|----------|-------------|----------|-------------|----------|----------|----------|----------|----------|----------|
| VEs                                 | Ved   | VEI         |          |             |          |             |          |             |          |             |          |          |          |          |          |          |
|                                     |       | 0           |          | 0.25        |          | 0.5         |          | 0.75        |          | 1           |          |          |          |          |          |          |
|                                     |       | growth rate | 95% CI   |          |          |          |          |          |
| 0                                   | 0.6   | 1.55E-02    | 1.50E-02 | 1.61E-02    | 1.26E-02 | 1.16E-02    | 1.36E-02 | 1.01E-02    | 9.23E-03 | 1.08E-02    | 6.26E-03 | 5.45E-03 | 6.96E-03 | 1.74E-03 | 8.11E-04 | 2.94E-03 |
| 0.15                                | 0.529 | 1.54E-02    | 1.49E-02 | 1.60E-02    | 1.23E-02 | 1.16E-02    | 1.30E-02 | 9.41E-03    | 8.77E-03 | 1.01E-02    | 5.70E-03 | 5.12E-03 | 6.26E-03 | 2.11E-03 | 1.23E-03 | 3.09E-03 |
| 0.368                               | 0.368 | 1.49E-02    | 1.43E-02 | 1.55E-02    | 1.32E-02 | 1.26E-02    | 1.37E-02 | 9.75E-03    | 9.20E-03 | 1.04E-02    | 5.87E-03 | 5.06E-03 | 6.79E-03 | 1.57E-03 | 7.93E-04 | 2.48E-03 |
| 0.529                               | 0.15  | 1.46E-02    | 1.37E-02 | 1.55E-02    | 1.25E-02 | 1.22E-02    | 1.28E-02 | 9.16E-03    | 8.55E-03 | 9.76E-03    | 5.80E-03 | 4.90E-03 | 6.50E-03 | 1.41E-03 | 7.15E-04 | 2.13E-03 |
| 0.6                                 | 0     | 1.57E-02    | 1.51E-02 | 1.65E-02    | 1.27E-02 | 1.20E-02    | 1.35E-02 | 9.64E-03    | 8.86E-03 | 1.07E-02    | 6.33E-03 | 5.71E-03 | 7.07E-03 | 1.40E-03 | 6.65E-04 | 2.18E-03 |

Table S11: Mean incidence growth rate values and 95% ensemble bootstrap CIs produced by the ABM for various combinations of vaccine efficacy parameters and coverage levels, assuming a clinical efficacy of VEC = 0.6 and active case-targeted NPIs consisting of case isolation, home-quarantine of household contacts of detected cases, and international travel restrictions (n = 10 instances per scenario).



### General Vaccination with Case-Targeted NPIs, VEC = 0.6

| population vaccinated: 2.3 M (~10%) |       |             |        |       |             |        |       |             |        |       |             |        |       |             |        |       |
|-------------------------------------|-------|-------------|--------|-------|-------------|--------|-------|-------------|--------|-------|-------------|--------|-------|-------------|--------|-------|
|                                     |       | VEi         |        |       |             |        |       |             |        |       |             |        |       |             |        |       |
| VEs                                 | VEd   | 0           |        |       | 0.25        |        |       | 0.5         |        |       | 0.75        |        |       | 1           |        |       |
|                                     |       | day of peak | 95% CI |       |
| 0                                   | 0.6   | 134         | 132.3  | 135.2 | 133         | 131.2  | 135.7 | 136         | 134.0  | 137.9 | 136         | 135.4  | 137.9 | 137         | 135.6  | 139.0 |
| 0.15                                | 0.529 | 134         | 131.6  | 137.1 | 135         | 132.9  | 136.3 | 135         | 133.0  | 136.3 | 136         | 133.9  | 138.4 | 139         | 136.4  | 141.0 |
| 0.368                               | 0.368 | 137         | 135.3  | 138.5 | 135         | 133.9  | 136.6 | 137         | 134.9  | 138.8 | 136         | 135.4  | 137.7 | 137         | 135.6  | 139.2 |
| 0.529                               | 0.15  | 135         | 132.8  | 137.6 | 135         | 132.7  | 136.0 | 135         | 134.1  | 137.5 | 136         | 133.9  | 137.8 | 137         | 135.6  | 138.6 |
| 0.6                                 | 0     | 136         | 135.1  | 136.5 | 136         | 134.6  | 137.4 | 137         | 135.1  | 139.1 | 136         | 135.3  | 137.7 | 136         | 134.1  | 139.0 |

  

| population vaccinated: 4.6 M (~20%) |       |             |        |       |             |        |       |             |        |       |             |        |       |             |        |       |
|-------------------------------------|-------|-------------|--------|-------|-------------|--------|-------|-------------|--------|-------|-------------|--------|-------|-------------|--------|-------|
|                                     |       | VEi         |        |       |             |        |       |             |        |       |             |        |       |             |        |       |
| VEs                                 | VEd   | 0           |        |       | 0.25        |        |       | 0.5         |        |       | 0.75        |        |       | 1           |        |       |
|                                     |       | day of peak | 95% CI |       |
| 0                                   | 0.6   | 135         | 133.6  | 135.7 | 138         | 136.1  | 140.4 | 140         | 137.7  | 141.4 | 142         | 140.6  | 143.2 | 145         | 143.2  | 147.6 |
| 0.15                                | 0.529 | 138         | 135.2  | 141.5 | 137         | 134.7  | 139.6 | 141         | 138.8  | 143.0 | 143         | 140.2  | 147.0 | 148         | 144.7  | 152.3 |
| 0.368                               | 0.368 | 137         | 134.1  | 138.7 | 138         | 136.5  | 140.4 | 142         | 139.8  | 144.0 | 144         | 141.4  | 147.4 | 142         | 139.7  | 144.5 |
| 0.529                               | 0.15  | 138         | 136.1  | 140.3 | 140         | 137.8  | 141.3 | 143         | 140.5  | 144.8 | 143         | 141.7  | 143.5 | 145         | 142.8  | 147.1 |
| 0.6                                 | 0     | 139         | 136.7  | 140.6 | 140         | 137.3  | 141.6 | 141         | 138.9  | 143.3 | 146         | 143.4  | 149.3 | 145         | 142.5  | 147.6 |

  

| population vaccinated: 9.2 M (~40%) |       |             |        |       |             |        |       |             |        |       |             |        |       |             |        |       |
|-------------------------------------|-------|-------------|--------|-------|-------------|--------|-------|-------------|--------|-------|-------------|--------|-------|-------------|--------|-------|
|                                     |       | VEi         |        |       |             |        |       |             |        |       |             |        |       |             |        |       |
| VEs                                 | VEd   | 0           |        |       | 0.25        |        |       | 0.5         |        |       | 0.75        |        |       | 1           |        |       |
|                                     |       | day of peak | 95% CI |       |
| 0                                   | 0.6   | 138         | 136.3  | 139.8 | 146         | 142.9  | 147.6 | 153         | 150.7  | 155.7 | 158         | 156.0  | 159.8 | 172         | 165.4  | 179.3 |
| 0.15                                | 0.529 | 140         | 138.8  | 141.9 | 147         | 144.6  | 148.9 | 154         | 151.7  | 158.1 | 163         | 159.8  | 166.8 | 169         | 165.7  | 173.1 |
| 0.368                               | 0.368 | 147         | 144.6  | 148.5 | 151         | 148.4  | 154.0 | 155         | 152.7  | 157.5 | 160         | 156.6  | 163.5 | 166         | 162.4  | 170.5 |
| 0.529                               | 0.15  | 148         | 145.9  | 150.8 | 154         | 151.5  | 155.5 | 159         | 155.6  | 163.7 | 164         | 160.9  | 168.2 | 167         | 161.7  | 172.4 |
| 0.6                                 | 0     | 150         | 147.1  | 152.2 | 156         | 152.5  | 158.3 | 158         | 155.7  | 160.8 | 162         | 160.0  | 163.8 | 168         | 165.1  | 170.1 |

  

| population vaccinated: 13.8 M (~60%) |       |             |        |       |             |        |       |             |        |       |             |        |       |             |        |       |
|--------------------------------------|-------|-------------|--------|-------|-------------|--------|-------|-------------|--------|-------|-------------|--------|-------|-------------|--------|-------|
|                                      |       | VEi         |        |       |             |        |       |             |        |       |             |        |       |             |        |       |
| VEs                                  | VEd   | 0           |        |       | 0.25        |        |       | 0.5         |        |       | 0.75        |        |       | 1           |        |       |
|                                      |       | day of peak | 95% CI |       |
| 0                                    | 0.6   | 144         | 140.7  | 146.7 | 157         | 153.2  | 163.1 | 167         | 164.7  | 169.1 | 182         | 178.9  | 185.8 | 194         | 191.4  | 195.0 |
| 0.15                                 | 0.529 | 148         | 145.8  | 150.2 | 158         | 155.8  | 159.0 | 169         | 165.7  | 173.2 | 183         | 178.7  | 188.4 | 194         | 191.7  | 195.0 |
| 0.368                                | 0.368 | 156         | 153.9  | 158.1 | 161         | 157.9  | 163.6 | 177         | 172.8  | 181.4 | 188         | 184.8  | 191.3 | 195         | 194.1  | 195.0 |
| 0.529                                | 0.15  | 165         | 161.5  | 169.6 | 170         | 168.1  | 172.9 | 181         | 176.8  | 185.3 | 192         | 189.2  | 194.5 | 195         | 194.2  | 195.0 |
| 0.6                                  | 0     | 165         | 162.2  | 168.0 | 173         | 170.1  | 175.8 | 182         | 178.6  | 185.7 | 192         | 190.0  | 193.0 | 195         | 194.2  | 195.0 |

  

| population vaccinated: 18.4 M (~80%) |       |             |        |       |             |        |       |             |        |       |             |        |       |             |        |       |
|--------------------------------------|-------|-------------|--------|-------|-------------|--------|-------|-------------|--------|-------|-------------|--------|-------|-------------|--------|-------|
|                                      |       | VEi         |        |       |             |        |       |             |        |       |             |        |       |             |        |       |
| VEs                                  | VEd   | 0           |        |       | 0.25        |        |       | 0.5         |        |       | 0.75        |        |       | 1           |        |       |
|                                      |       | day of peak | 95% CI |       |
| 0                                    | 0.6   | 145         | 143.9  | 147.0 | 161         | 157.7  | 163.6 | 183         | 180.6  | 186.3 | 195         | 195.0  | 195.0 | 195         | 195.0  | 195.0 |
| 0.15                                 | 0.529 | 154         | 151.4  | 156.9 | 167         | 164.6  | 168.9 | 192         | 189.1  | 193.5 | 195         | 195.0  | 195.0 | 195         | 195.0  | 195.0 |
| 0.368                                | 0.368 | 166         | 164.4  | 168.4 | 180         | 176.7  | 184.8 | 195         | 194.6  | 195.0 | 195         | 195.0  | 195.0 | 195         | 195.0  | 195.0 |
| 0.529                                | 0.15  | 179         | 176.1  | 181.6 | 187         | 184.5  | 190.0 | 195         | 194.1  | 195.0 | 195         | 195.0  | 195.0 | 195         | 195.0  | 195.0 |
| 0.6                                  | 0     | 180         | 176.2  | 183.2 | 194         | 193.4  | 194.9 | 195         | 195.0  | 195.0 | 195         | 195.0  | 195.0 | 195         | 195.0  | 195.0 |

  

| population vaccinated: 23 M (~100%) |       |             |        |       |             |        |       |             |        |       |             |        |       |             |        |       |
|-------------------------------------|-------|-------------|--------|-------|-------------|--------|-------|-------------|--------|-------|-------------|--------|-------|-------------|--------|-------|
|                                     |       | VEi         |        |       |             |        |       |             |        |       |             |        |       |             |        |       |
| VEs                                 | VEd   | 0           |        |       | 0.25        |        |       | 0.5         |        |       | 0.75        |        |       | 1           |        |       |
|                                     |       | day of peak | 95% CI |       |
| 0                                   | 0.6   | 176         | 163.9  | 185.9 | 168         | 153.1  | 178.3 | 168         | 139.7  | 184.2 | 159         | 138.7  | 177.0 | 143         | 116.7  | 167.3 |
| 0.15                                | 0.529 | 161         | 151.4  | 173.3 | 163         | 135.7  | 178.6 | 145         | 126.9  | 162.8 | 144         | 125.2  | 160.6 | 141         | 116.0  | 159.0 |
| 0.368                               | 0.368 | 158         | 144.7  | 167.6 | 167         | 148.1  | 181.5 | 173         | 154.1  | 187.1 | 162         | 139.3  | 177.4 | 134         | 109.9  | 159.0 |
| 0.529                               | 0.15  | 179         | 168.1  | 187.5 | 175         | 161.4  | 184.5 | 151         | 122.8  | 172.5 | 160         | 134.9  | 179.5 | 130         | 108.5  | 152.7 |
| 0.6                                 | 0     | 164         | 147.8  | 180.2 | 158         | 148.3  | 167.4 | 165         | 152.4  | 176.8 | 163         | 144.3  | 173.0 | 130         | 104.8  | 154.0 |

Table S13: Prevalence peak times (means and 95% ensemble bootstrap CIs) produced by the ABM for various combinations of vaccine efficacy parameters and coverage levels, assuming a clinical efficacy of VEC = 0.6 and active case-targeted NPIs consisting of case isolation, home-quarantine of household contacts of detected cases, and international travel restrictions (n = 10 instances per scenario).

**Priority Vaccination with Case-Targeted NPIs, VEc = 0.9**

| population vaccinated: 2.3 M (~10%) |       |             |          |             |          |             |          |             |          |             |          |          |          |          |          |          |
|-------------------------------------|-------|-------------|----------|-------------|----------|-------------|----------|-------------|----------|-------------|----------|----------|----------|----------|----------|----------|
| VEs                                 | Ved   | VEI         |          |             |          |             |          |             |          |             |          |          |          |          |          |          |
|                                     |       | 0           |          | 0.25        |          | 0.5         |          | 0.75        |          | 1           |          |          |          |          |          |          |
|                                     |       | growth rate | 95% CI   |          |          |          |          |          |
| 0                                   | 0.9   | 1.15E-01    | 1.13E-01 | 1.18E-01    | 1.14E-01 | 1.11E-01    | 1.17E-01 | 1.13E-01    | 1.10E-01 | 1.16E-01    | 1.13E-01 | 1.10E-01 | 1.15E-01 | 1.14E-01 | 1.11E-01 | 1.17E-01 |
| 0.225                               | 0.871 | 1.15E-01    | 1.12E-01 | 1.18E-01    | 1.13E-01 | 1.12E-01    | 1.15E-01 | 1.12E-01    | 1.09E-01 | 1.15E-01    | 1.12E-01 | 1.09E-01 | 1.14E-01 | 1.11E-01 | 1.09E-01 | 1.12E-01 |
| 0.684                               | 0.684 | 1.12E-01    | 1.07E-01 | 1.16E-01    | 1.12E-01 | 1.09E-01    | 1.15E-01 | 1.14E-01    | 1.11E-01 | 1.17E-01    | 1.11E-01 | 1.08E-01 | 1.14E-01 | 1.11E-01 | 1.07E-01 | 1.14E-01 |
| 0.871                               | 0.225 | 1.15E-01    | 1.11E-01 | 1.18E-01    | 1.13E-01 | 1.10E-01    | 1.16E-01 | 1.10E-01    | 1.07E-01 | 1.14E-01    | 1.11E-01 | 1.09E-01 | 1.13E-01 | 1.11E-01 | 1.08E-01 | 1.14E-01 |
| 0.9                                 | 0     | 1.13E-01    | 1.09E-01 | 1.15E-01    | 1.13E-01 | 1.09E-01    | 1.17E-01 | 1.13E-01    | 1.10E-01 | 1.16E-01    | 1.11E-01 | 1.08E-01 | 1.15E-01 | 1.13E-01 | 1.11E-01 | 1.14E-01 |

  

| population vaccinated: 4.6 M (~20%) |       |             |          |             |          |             |          |             |          |             |          |          |          |          |          |          |
|-------------------------------------|-------|-------------|----------|-------------|----------|-------------|----------|-------------|----------|-------------|----------|----------|----------|----------|----------|----------|
| VEs                                 | Ved   | VEI         |          |             |          |             |          |             |          |             |          |          |          |          |          |          |
|                                     |       | 0           |          | 0.25        |          | 0.5         |          | 0.75        |          | 1           |          |          |          |          |          |          |
|                                     |       | growth rate | 95% CI   |          |          |          |          |          |
| 0                                   | 0.9   | 1.13E-01    | 1.10E-01 | 1.16E-01    | 1.11E-01 | 1.09E-01    | 1.13E-01 | 1.08E-01    | 1.05E-01 | 1.11E-01    | 1.06E-01 | 1.04E-01 | 1.09E-01 | 1.04E-01 | 1.02E-01 | 1.07E-01 |
| 0.225                               | 0.871 | 1.11E-01    | 1.09E-01 | 1.14E-01    | 1.09E-01 | 1.06E-01    | 1.13E-01 | 1.08E-01    | 1.05E-01 | 1.12E-01    | 1.07E-01 | 1.04E-01 | 1.10E-01 | 1.08E-01 | 1.05E-01 | 1.10E-01 |
| 0.684                               | 0.684 | 1.09E-01    | 1.06E-01 | 1.12E-01    | 1.06E-01 | 1.03E-01    | 1.09E-01 | 1.07E-01    | 1.04E-01 | 1.11E-01    | 1.03E-01 | 1.01E-01 | 1.05E-01 | 1.03E-01 | 1.01E-01 | 1.06E-01 |
| 0.871                               | 0.225 | 1.07E-01    | 1.05E-01 | 1.10E-01    | 1.09E-01 | 1.06E-01    | 1.11E-01 | 1.07E-01    | 1.04E-01 | 1.10E-01    | 1.06E-01 | 1.05E-01 | 1.08E-01 | 1.05E-01 | 1.03E-01 | 1.07E-01 |
| 0.9                                 | 0     | 1.08E-01    | 1.06E-01 | 1.10E-01    | 1.05E-01 | 1.02E-01    | 1.08E-01 | 1.07E-01    | 1.05E-01 | 1.08E-01    | 1.04E-01 | 1.02E-01 | 1.06E-01 | 1.03E-01 | 1.01E-01 | 1.05E-01 |

  

| population vaccinated: 9.2 M (~40%) |       |             |          |             |          |             |          |             |          |             |          |          |          |          |          |          |
|-------------------------------------|-------|-------------|----------|-------------|----------|-------------|----------|-------------|----------|-------------|----------|----------|----------|----------|----------|----------|
| VEs                                 | Ved   | VEI         |          |             |          |             |          |             |          |             |          |          |          |          |          |          |
|                                     |       | 0           |          | 0.25        |          | 0.5         |          | 0.75        |          | 1           |          |          |          |          |          |          |
|                                     |       | growth rate | 95% CI   |          |          |          |          |          |
| 0                                   | 0.9   | 1.06E-01    | 1.03E-01 | 1.08E-01    | 1.03E-01 | 9.98E-02    | 1.05E-01 | 9.52E-02    | 9.16E-02 | 9.84E-02    | 9.21E-02 | 8.89E-02 | 9.52E-02 | 8.53E-02 | 8.30E-02 | 8.76E-02 |
| 0.225                               | 0.871 | 1.04E-01    | 9.96E-02 | 1.08E-01    | 9.82E-02 | 9.63E-02    | 1.00E-01 | 9.13E-02    | 8.85E-02 | 9.45E-02    | 8.92E-02 | 8.77E-02 | 9.05E-02 | 8.56E-02 | 8.41E-02 | 8.71E-02 |
| 0.684                               | 0.684 | 9.45E-02    | 9.16E-02 | 9.78E-02    | 8.96E-02 | 8.72E-02    | 9.21E-02 | 9.09E-02    | 8.84E-02 | 9.38E-02    | 8.66E-02 | 8.39E-02 | 8.92E-02 | 8.66E-02 | 8.48E-02 | 8.86E-02 |
| 0.871                               | 0.225 | 9.08E-02    | 8.78E-02 | 9.37E-02    | 9.02E-02 | 8.76E-02    | 9.29E-02 | 8.71E-02    | 8.51E-02 | 8.91E-02    | 8.62E-02 | 8.31E-02 | 8.89E-02 | 8.25E-02 | 8.03E-02 | 8.45E-02 |
| 0.9                                 | 0     | 8.81E-02    | 8.53E-02 | 9.08E-02    | 8.78E-02 | 8.53E-02    | 9.01E-02 | 8.79E-02    | 8.54E-02 | 9.01E-02    | 8.59E-02 | 8.36E-02 | 8.83E-02 | 8.43E-02 | 8.25E-02 | 8.63E-02 |

  

| population vaccinated: 13.8 M (~60%) |       |             |          |             |          |             |          |             |          |             |          |          |          |          |          |          |
|--------------------------------------|-------|-------------|----------|-------------|----------|-------------|----------|-------------|----------|-------------|----------|----------|----------|----------|----------|----------|
| VEs                                  | Ved   | VEI         |          |             |          |             |          |             |          |             |          |          |          |          |          |          |
|                                      |       | 0           |          | 0.25        |          | 0.5         |          | 0.75        |          | 1           |          |          |          |          |          |          |
|                                      |       | growth rate | 95% CI   |          |          |          |          |          |
| 0                                    | 0.9   | 1.05E-01    | 1.03E-01 | 1.06E-01    | 9.35E-02 | 9.15E-02    | 9.57E-02 | 8.35E-02    | 8.03E-02 | 8.54E-02    | 7.52E-02 | 7.36E-02 | 7.65E-02 | 6.33E-02 | 6.17E-02 | 6.51E-02 |
| 0.225                                | 0.871 | 9.30E-02    | 9.04E-02 | 9.61E-02    | 8.81E-02 | 8.64E-02    | 9.01E-02 | 7.83E-02    | 7.65E-02 | 8.06E-02    | 7.22E-02 | 6.94E-02 | 7.45E-02 | 6.10E-02 | 5.97E-02 | 6.26E-02 |
| 0.684                                | 0.684 | 7.91E-02    | 7.77E-02 | 8.10E-02    | 7.53E-02 | 7.34E-02    | 7.74E-02 | 7.19E-02    | 7.01E-02 | 7.37E-02    | 6.69E-02 | 6.49E-02 | 6.86E-02 | 6.14E-02 | 5.98E-02 | 6.29E-02 |
| 0.871                                | 0.225 | 7.16E-02    | 6.91E-02 | 7.36E-02    | 6.92E-02 | 6.64E-02    | 7.16E-02 | 6.58E-02    | 6.31E-02 | 6.84E-02    | 6.55E-02 | 6.35E-02 | 6.75E-02 | 6.52E-02 | 6.29E-02 | 6.72E-02 |
| 0.9                                  | 0     | 7.00E-02    | 6.84E-02 | 7.11E-02    | 6.80E-02 | 6.60E-02    | 6.99E-02 | 6.59E-02    | 6.39E-02 | 6.80E-02    | 6.52E-02 | 6.32E-02 | 6.78E-02 | 6.33E-02 | 6.17E-02 | 6.51E-02 |

  

| population vaccinated: 18.4 M (~80%) |       |             |          |             |          |             |          |             |          |             |          |          |          |          |          |          |
|--------------------------------------|-------|-------------|----------|-------------|----------|-------------|----------|-------------|----------|-------------|----------|----------|----------|----------|----------|----------|
| VEs                                  | Ved   | VEI         |          |             |          |             |          |             |          |             |          |          |          |          |          |          |
|                                      |       | 0           |          | 0.25        |          | 0.5         |          | 0.75        |          | 1           |          |          |          |          |          |          |
|                                      |       | growth rate | 95% CI   |          |          |          |          |          |
| 0                                    | 0.9   | 9.63E-02    | 9.47E-02 | 9.75E-02    | 8.28E-02 | 8.02E-02    | 8.56E-02 | 7.01E-02    | 6.87E-02 | 7.16E-02    | 5.58E-02 | 5.39E-02 | 5.73E-02 | 4.06E-02 | 3.89E-02 | 4.22E-02 |
| 0.225                                | 0.871 | 8.80E-02    | 8.62E-02 | 8.97E-02    | 7.64E-02 | 7.48E-02    | 7.82E-02 | 6.53E-02    | 6.34E-02 | 6.78E-02    | 5.21E-02 | 5.04E-02 | 5.43E-02 | 4.10E-02 | 3.84E-02 | 4.28E-02 |
| 0.684                                | 0.684 | 6.29E-02    | 6.17E-02 | 6.42E-02    | 5.70E-02 | 5.54E-02    | 5.86E-02 | 5.25E-02    | 5.01E-02 | 5.46E-02    | 4.44E-02 | 4.23E-02 | 4.61E-02 | 3.99E-02 | 3.92E-02 | 4.08E-02 |
| 0.871                                | 0.225 | 5.12E-02    | 4.99E-02 | 5.25E-02    | 4.81E-02 | 4.64E-02    | 4.94E-02 | 4.58E-02    | 4.43E-02 | 4.79E-02    | 4.24E-02 | 4.07E-02 | 4.39E-02 | 3.76E-02 | 3.63E-02 | 3.91E-02 |
| 0.9                                  | 0     | 5.13E-02    | 4.97E-02 | 5.35E-02    | 4.73E-02 | 4.56E-02    | 4.87E-02 | 4.57E-02    | 4.47E-02 | 4.67E-02    | 4.15E-02 | 3.98E-02 | 4.29E-02 | 3.97E-02 | 3.79E-02 | 4.17E-02 |

  

| population vaccinated: 23 M (~100%) |       |             |          |             |          |             |          |             |          |             |          |          |          |          |          |          |
|-------------------------------------|-------|-------------|----------|-------------|----------|-------------|----------|-------------|----------|-------------|----------|----------|----------|----------|----------|----------|
| VEs                                 | Ved   | VEI         |          |             |          |             |          |             |          |             |          |          |          |          |          |          |
|                                     |       | 0           |          | 0.25        |          | 0.5         |          | 0.75        |          | 1           |          |          |          |          |          |          |
|                                     |       | growth rate | 95% CI   |          |          |          |          |          |
| 0                                   | 0.9   | 2.75E-03    | 2.34E-03 | 3.19E-03    | 1.15E-03 | 8.56E-04    | 1.45E-03 | 3.31E-05    | 7.86E-13 | 1.32E-04    | 4.96E-11 | 2.99E-12 | 1.20E-10 | 2.05E-11 | 2.54E-12 | 6.16E-11 |
| 0.225                               | 0.871 | 2.82E-03    | 2.39E-03 | 3.17E-03    | 1.64E-03 | 1.23E-03    | 2.08E-03 | 1.71E-05    | 9.75E-13 | 6.84E-05    | 1.74E-11 | 2.14E-12 | 3.98E-11 | 1.73E-11 | 2.11E-12 | 2.63E-11 |
| 0.684                               | 0.684 | 2.48E-03    | 2.14E-03 | 2.77E-03    | 1.04E-03 | 7.56E-04    | 1.33E-03 | 6.33E-11    | 1.47E-12 | 1.93E-10    | 2.57E-11 | 7.48E-12 | 5.27E-11 | 1.76E-11 | 2.15E-12 | 4.50E-11 |
| 0.871                               | 0.225 | 2.84E-03    | 2.44E-03 | 3.20E-03    | 1.67E-03 | 1.30E-03    | 2.02E-03 | 3.91E-05    | 2.67E-12 | 1.56E-04    | 3.27E-11 | 7.37E-12 | 6.98E-11 | 1.91E-11 | 2.75E-12 | 4.34E-11 |
| 0.9                                 | 0     | 3.00E-03    | 2.63E-03 | 3.35E-03    | 1.53E-03 | 1.04E-03    | 1.99E-03 | 4.79E-05    | 6.79E-11 | 1.21E-04    | 1.52E-12 | 3.78E-13 | 3.81E-12 | 1.61E-11 | 2.02E-12 | 3.76E-11 |

Table S14: Mean incidence growth rate and 95% ensemble bootstrap CIs produced by the ABM for various combinations of vaccine efficacy parameters and coverage levels, assuming a clinical efficacy of VEc = 0.9 and active case-targeted NPIs consisting of case isolation, home-quarantine of household contacts of detected cases, and international travel restrictions (n = 10 instances per scenario).

**Priority Vaccination with Case-Targeted NPIs, VEC = 0.9**

| population vaccinated: 2.3 M (~10%) |       |            |          |            |          |            |          |            |          |            |          |          |          |          |          |          |
|-------------------------------------|-------|------------|----------|------------|----------|------------|----------|------------|----------|------------|----------|----------|----------|----------|----------|----------|
| VEs                                 | VEd   | VEI        |          |            |          |            |          |            |          |            |          |          |          |          |          |          |
|                                     |       | 0          |          | 0.25       |          | 0.5        |          | 0.75       |          | 1          |          |          |          |          |          |          |
|                                     |       | prevalence | 95% CI   |          |          |          |          |          |
| 0                                   | 0.9   | 1.05E+06   | 1.01E+06 | 1.08E+06   | 1.06E+06 | 1.03E+06   | 1.09E+06 | 1.01E+06   | 9.58E+05 | 1.04E+06   | 9.78E+05 | 9.44E+05 | 1.01E+06 | 9.26E+05 | 8.73E+05 | 9.69E+05 |
| 0.225                               | 0.871 | 1.03E+06   | 9.91E+05 | 1.06E+06   | 1.00E+06 | 9.70E+05   | 1.03E+06 | 9.99E+05   | 9.72E+05 | 1.03E+06   | 9.39E+05 | 9.05E+05 | 9.77E+05 | 9.57E+05 | 9.31E+05 | 9.82E+05 |
| 0.684                               | 0.684 | 9.96E+05   | 9.83E+05 | 1.01E+06   | 9.86E+05 | 9.61E+05   | 1.02E+06 | 9.66E+05   | 9.31E+05 | 9.98E+05   | 9.36E+05 | 9.03E+05 | 9.68E+05 | 9.16E+05 | 8.77E+05 | 9.59E+05 |
| 0.871                               | 0.225 | 9.90E+05   | 9.55E+05 | 1.02E+06   | 9.34E+05 | 9.02E+05   | 9.61E+05 | 9.14E+05   | 8.77E+05 | 9.54E+05   | 9.16E+05 | 8.96E+05 | 9.43E+05 | 9.55E+05 | 9.37E+05 | 9.69E+05 |
| 0.9                                 | 0     | 9.51E+05   | 9.06E+05 | 9.89E+05   | 9.61E+05 | 9.33E+05   | 9.90E+05 | 9.22E+05   | 8.92E+05 | 9.49E+05   | 9.22E+05 | 9.00E+05 | 9.40E+05 | 9.24E+05 | 8.90E+05 | 9.48E+05 |

  

| population vaccinated: 4.6 M (~20%) |       |            |          |            |          |            |          |            |          |            |          |          |          |          |          |          |
|-------------------------------------|-------|------------|----------|------------|----------|------------|----------|------------|----------|------------|----------|----------|----------|----------|----------|----------|
| VEs                                 | VEd   | VEI        |          |            |          |            |          |            |          |            |          |          |          |          |          |          |
|                                     |       | 0          |          | 0.25       |          | 0.5        |          | 0.75       |          | 1          |          |          |          |          |          |          |
|                                     |       | prevalence | 95% CI   |          |          |          |          |          |
| 0                                   | 0.9   | 9.14E+05   | 8.83E+05 | 9.43E+05   | 8.98E+05 | 8.76E+05   | 9.18E+05 | 7.91E+05   | 7.66E+05 | 8.19E+05   | 7.58E+05 | 7.31E+05 | 7.78E+05 | 7.11E+05 | 6.92E+05 | 7.29E+05 |
| 0.225                               | 0.871 | 8.67E+05   | 8.31E+05 | 9.02E+05   | 8.15E+05 | 7.72E+05   | 8.42E+05 | 8.00E+05   | 7.75E+05 | 8.16E+05   | 7.64E+05 | 7.45E+05 | 7.79E+05 | 7.21E+05 | 7.11E+05 | 7.32E+05 |
| 0.684                               | 0.684 | 7.74E+05   | 7.43E+05 | 8.04E+05   | 7.61E+05 | 7.33E+05   | 7.84E+05 | 7.47E+05   | 7.19E+05 | 7.76E+05   | 7.29E+05 | 7.03E+05 | 7.53E+05 | 7.11E+05 | 6.90E+05 | 7.32E+05 |
| 0.871                               | 0.225 | 7.17E+05   | 6.84E+05 | 7.46E+05   | 7.06E+05 | 6.77E+05   | 7.35E+05 | 7.09E+05   | 6.89E+05 | 7.35E+05   | 6.77E+05 | 6.53E+05 | 7.00E+05 | 6.90E+05 | 6.71E+05 | 7.16E+05 |
| 0.9                                 | 0     | 7.25E+05   | 7.05E+05 | 7.38E+05   | 7.33E+05 | 7.13E+05   | 7.55E+05 | 7.16E+05   | 7.03E+05 | 7.31E+05   | 6.94E+05 | 6.68E+05 | 7.17E+05 | 6.86E+05 | 6.70E+05 | 7.01E+05 |

  

| population vaccinated: 9.2 M (~40%) |       |            |          |            |          |            |          |            |          |            |          |          |          |          |          |          |
|-------------------------------------|-------|------------|----------|------------|----------|------------|----------|------------|----------|------------|----------|----------|----------|----------|----------|----------|
| VEs                                 | VEd   | VEI        |          |            |          |            |          |            |          |            |          |          |          |          |          |          |
|                                     |       | 0          |          | 0.25       |          | 0.5        |          | 0.75       |          | 1          |          |          |          |          |          |          |
|                                     |       | prevalence | 95% CI   |          |          |          |          |          |
| 0                                   | 0.9   | 6.48E+05   | 6.30E+05 | 6.65E+05   | 5.65E+05 | 5.48E+05   | 5.79E+05 | 4.89E+05   | 4.80E+05 | 5.02E+05   | 4.08E+05 | 3.89E+05 | 4.28E+05 | 3.25E+05 | 3.03E+05 | 3.44E+05 |
| 0.225                               | 0.871 | 5.99E+05   | 5.80E+05 | 6.19E+05   | 5.03E+05 | 4.90E+05   | 5.15E+05 | 4.43E+05   | 4.26E+05 | 4.58E+05   | 3.85E+05 | 3.76E+05 | 3.95E+05 | 3.22E+05 | 3.10E+05 | 3.30E+05 |
| 0.684                               | 0.684 | 4.37E+05   | 4.20E+05 | 4.54E+05   | 3.98E+05 | 3.85E+05   | 4.11E+05 | 3.63E+05   | 3.49E+05 | 3.78E+05   | 3.15E+05 | 2.98E+05 | 3.30E+05 | 3.07E+05 | 2.96E+05 | 3.20E+05 |
| 0.871                               | 0.225 | 3.58E+05   | 3.43E+05 | 3.71E+05   | 3.67E+05 | 3.57E+05   | 3.77E+05 | 3.37E+05   | 3.32E+05 | 3.43E+05   | 3.10E+05 | 2.99E+05 | 3.22E+05 | 3.04E+05 | 2.95E+05 | 3.14E+05 |
| 0.9                                 | 0     | 3.58E+05   | 3.53E+05 | 3.62E+05   | 3.48E+05 | 3.34E+05   | 3.58E+05 | 3.36E+05   | 3.21E+05 | 3.49E+05   | 3.20E+05 | 3.11E+05 | 3.30E+05 | 3.00E+05 | 2.85E+05 | 3.12E+05 |

  

| population vaccinated: 13.8 M (~60%) |       |            |          |            |          |            |          |            |          |            |          |          |          |          |          |          |
|--------------------------------------|-------|------------|----------|------------|----------|------------|----------|------------|----------|------------|----------|----------|----------|----------|----------|----------|
| VEs                                  | VEd   | VEI        |          |            |          |            |          |            |          |            |          |          |          |          |          |          |
|                                      |       | 0          |          | 0.25       |          | 0.5        |          | 0.75       |          | 1          |          |          |          |          |          |          |
|                                      |       | prevalence | 95% CI   |          |          |          |          |          |
| 0                                    | 0.9   | 4.39E+05   | 4.24E+05 | 4.55E+05   | 3.35E+05 | 3.18E+05   | 3.51E+05 | 2.63E+05   | 2.55E+05 | 2.69E+05   | 1.86E+05 | 1.74E+05 | 1.96E+05 | 1.16E+05 | 1.04E+05 | 1.26E+05 |
| 0.225                                | 0.871 | 3.62E+05   | 3.47E+05 | 3.76E+05   | 2.81E+05 | 2.64E+05   | 2.96E+05 | 2.22E+05   | 2.06E+05 | 2.36E+05   | 1.59E+05 | 1.43E+05 | 1.72E+05 | 1.06E+05 | 9.53E+04 | 1.15E+05 |
| 0.684                                | 0.684 | 2.08E+05   | 2.00E+05 | 2.15E+05   | 1.83E+05 | 1.74E+05   | 1.89E+05 | 1.57E+05   | 1.48E+05 | 1.66E+05   | 1.23E+05 | 1.07E+05 | 1.33E+05 | 1.06E+05 | 9.12E+04 | 1.18E+05 |
| 0.871                                | 0.225 | 1.53E+05   | 1.48E+05 | 1.58E+05   | 1.43E+05 | 1.38E+05   | 1.48E+05 | 1.32E+05   | 1.22E+05 | 1.38E+05   | 1.05E+05 | 9.36E+04 | 1.16E+05 | 9.50E+04 | 8.64E+04 | 1.02E+05 |
| 0.9                                  | 0     | 1.46E+05   | 1.41E+05 | 1.51E+05   | 1.40E+05 | 1.32E+05   | 1.47E+05 | 1.29E+05   | 1.22E+05 | 1.34E+05   | 1.15E+05 | 1.10E+05 | 1.20E+05 | 9.20E+04 | 8.64E+04 | 9.81E+04 |

  

| population vaccinated: 18.4 M (~80%) |       |            |          |            |          |            |          |            |          |            |          |          |          |          |          |          |
|--------------------------------------|-------|------------|----------|------------|----------|------------|----------|------------|----------|------------|----------|----------|----------|----------|----------|----------|
| VEs                                  | VEd   | VEI        |          |            |          |            |          |            |          |            |          |          |          |          |          |          |
|                                      |       | 0          |          | 0.25       |          | 0.5        |          | 0.75       |          | 1          |          |          |          |          |          |          |
|                                      |       | prevalence | 95% CI   |          |          |          |          |          |
| 0                                    | 0.9   | 2.86E+05   | 2.75E+05 | 2.92E+05   | 2.01E+05 | 1.94E+05   | 2.09E+05 | 1.34E+05   | 1.28E+05 | 1.39E+05   | 4.60E+04 | 3.80E+04 | 5.34E+04 | 6.00E+03 | 4.54E+03 | 7.54E+03 |
| 0.225                                | 0.871 | 2.17E+05   | 2.11E+05 | 2.24E+05   | 1.52E+05 | 1.42E+05   | 1.62E+05 | 1.02E+05   | 9.45E+04 | 1.10E+05   | 3.10E+04 | 2.61E+04 | 3.70E+04 | 6.00E+03 | 4.43E+03 | 8.71E+03 |
| 0.684                                | 0.684 | 8.10E+04   | 7.65E+04 | 8.69E+04   | 5.80E+04 | 5.42E+04   | 6.12E+04 | 3.20E+04   | 2.57E+04 | 3.68E+04   | 1.30E+04 | 1.00E+04 | 1.49E+04 | 7.00E+03 | 5.38E+03 | 8.54E+03 |
| 0.871                                | 0.225 | 3.60E+04   | 2.98E+04 | 4.15E+04   | 2.40E+04 | 2.11E+04   | 2.68E+04 | 1.50E+04   | 1.17E+04 | 1.88E+04   | 9.00E+03 | 7.65E+03 | 9.94E+03 | 5.00E+03 | 3.52E+03 | 6.22E+03 |
| 0.9                                  | 0     | 2.80E+04   | 2.28E+04 | 3.16E+04   | 2.30E+04 | 2.07E+04   | 2.47E+04 | 1.60E+04   | 1.38E+04 | 1.85E+04   | 9.00E+03 | 7.39E+03 | 1.09E+04 | 5.00E+03 | 4.34E+03 | 5.96E+03 |

  

| population vaccinated: 23 M (~100%) |       |            |        |            |        |            |        |            |        |            |        |    |    |   |   |    |
|-------------------------------------|-------|------------|--------|------------|--------|------------|--------|------------|--------|------------|--------|----|----|---|---|----|
| VEs                                 | VEd   | VEI        |        |            |        |            |        |            |        |            |        |    |    |   |   |    |
|                                     |       | 0          |        | 0.25       |        | 0.5        |        | 0.75       |        | 1          |        |    |    |   |   |    |
|                                     |       | prevalence | 95% CI |    |    |   |   |    |
| 0                                   | 0.9   | 20         | 19     | 22         | 17     | 16         | 18     | 14         | 13     | 15         | 11     | 10 | 12 | 8 | 7 | 9  |
| 0.225                               | 0.871 | 21         | 19     | 23         | 20     | 18         | 23     | 14         | 13     | 15         | 11     | 10 | 13 | 8 | 7 | 9  |
| 0.684                               | 0.684 | 21         | 19     | 22         | 18     | 17         | 20     | 14         | 14     | 15         | 11     | 10 | 12 | 7 | 7 | 8  |
| 0.871                               | 0.225 | 21         | 20     | 22         | 19     | 17         | 21     | 14         | 13     | 16         | 11     | 10 | 12 | 8 | 7 | 9  |
| 0.9                                 | 0     | 21         | 19     | 22         | 17     | 16         | 19     | 14         | 13     | 15         | 11     | 11 | 12 | 9 | 8 | 10 |

Table S15: Mean peak prevalence values and 95% ensemble bootstrap CIs produced by the ABM for various combinations of vaccine efficacy parameters and coverage levels, assuming a clinical efficacy of VEC = 0.9 and active case-targeted NPIs consisting of case isolation, home-quarantine of household contacts of detected cases, and international travel restrictions (n = 10 instances per scenario).

**Priority Vaccination with Case-Targeted NPIs, VEc = 0.9**

| population vaccinated: 2.3 M (~10%) |       |             |        |             |        |             |        |             |        |             |        |       |       |     |       |       |
|-------------------------------------|-------|-------------|--------|-------------|--------|-------------|--------|-------------|--------|-------------|--------|-------|-------|-----|-------|-------|
| VEs                                 | VEd   | VEi         |        |             |        |             |        |             |        |             |        |       |       |     |       |       |
|                                     |       | 0           |        | 0.25        |        | 0.5         |        | 0.75        |        | 1           |        |       |       |     |       |       |
|                                     |       | day of peak | 95% CI |       |       |     |       |       |
| 0                                   | 0.9   | 134         | 132.9  | 134.8       | 135    | 133.2       | 137.3  | 135         | 133.1  | 137.1       | 137    | 135.1 | 138.5 | 138 | 135.3 | 140.0 |
| 0.225                               | 0.871 | 135         | 133.2  | 137.7       | 137    | 134.6       | 138.9  | 136         | 134.7  | 138.4       | 136    | 135.3 | 137.7 | 137 | 135.8 | 139.4 |
| 0.684                               | 0.684 | 135         | 134.4  | 136.1       | 135    | 133.3       | 137.7  | 135         | 134.2  | 136.4       | 138    | 135.4 | 141.4 | 138 | 136.3 | 140.5 |
| 0.871                               | 0.225 | 135         | 134.6  | 136.3       | 138    | 136.1       | 140.3  | 138         | 135.0  | 140.1       | 137    | 135.7 | 139.0 | 138 | 136.2 | 140.1 |
| 0.9                                 | 0     | 137         | 134.8  | 139.3       | 137    | 135.0       | 139.9  | 137         | 134.7  | 139.1       | 139    | 136.1 | 141.1 | 136 | 134.9 | 138.1 |

  

| population vaccinated: 4.6 M (~20%) |       |             |        |             |        |             |        |             |        |             |        |       |       |     |       |       |
|-------------------------------------|-------|-------------|--------|-------------|--------|-------------|--------|-------------|--------|-------------|--------|-------|-------|-----|-------|-------|
| VEs                                 | VEd   | VEi         |        |             |        |             |        |             |        |             |        |       |       |     |       |       |
|                                     |       | 0           |        | 0.25        |        | 0.5         |        | 0.75        |        | 1           |        |       |       |     |       |       |
|                                     |       | day of peak | 95% CI |       |       |     |       |       |
| 0                                   | 0.9   | 137         | 135.0  | 138.7       | 139    | 135.8       | 141.9  | 141         | 138.7  | 142.5       | 144    | 141.2 | 147.5 | 147 | 144.6 | 149.2 |
| 0.225                               | 0.871 | 139         | 137.1  | 140.9       | 141    | 138.3       | 144.7  | 142         | 138.5  | 146.5       | 143    | 140.3 | 144.8 | 144 | 142.3 | 145.6 |
| 0.684                               | 0.684 | 141         | 139.5  | 142.7       | 141    | 138.4       | 143.1  | 142         | 139.7  | 143.5       | 143    | 141.4 | 144.7 | 145 | 142.3 | 147.5 |
| 0.871                               | 0.225 | 144         | 140.5  | 146.6       | 141    | 138.7       | 142.6  | 142         | 140.1  | 144.4       | 144    | 141.0 | 147.3 | 145 | 142.0 | 147.0 |
| 0.9                                 | 0     | 138         | 136.7  | 139.8       | 144    | 141.6       | 147.4  | 143         | 141.4  | 145.7       | 144    | 142.3 | 146.8 | 145 | 142.1 | 148.1 |

  

| population vaccinated: 9.2 M (~40%) |       |             |        |             |        |             |        |             |        |             |        |       |       |     |       |       |
|-------------------------------------|-------|-------------|--------|-------------|--------|-------------|--------|-------------|--------|-------------|--------|-------|-------|-----|-------|-------|
| VEs                                 | VEd   | VEi         |        |             |        |             |        |             |        |             |        |       |       |     |       |       |
|                                     |       | 0           |        | 0.25        |        | 0.5         |        | 0.75        |        | 1           |        |       |       |     |       |       |
|                                     |       | day of peak | 95% CI |       |       |     |       |       |
| 0                                   | 0.9   | 143         | 140.1  | 145.3       | 149    | 146.3       | 150.6  | 152         | 148.9  | 155.1       | 161    | 157.2 | 165.0 | 168 | 163.9 | 172.7 |
| 0.225                               | 0.871 | 145         | 143.2  | 148.0       | 152    | 149.7       | 154.9  | 157         | 154.9  | 158.7       | 162    | 158.8 | 164.4 | 170 | 166.5 | 174.3 |
| 0.684                               | 0.684 | 154         | 151.2  | 156.6       | 161    | 158.0       | 163.3  | 163         | 161.4  | 165.4       | 166    | 163.7 | 168.4 | 168 | 165.8 | 170.6 |
| 0.871                               | 0.225 | 162         | 158.3  | 165.7       | 163    | 159.3       | 166.6  | 163         | 160.3  | 166.5       | 165    | 162.1 | 168.9 | 167 | 164.6 | 170.0 |
| 0.9                                 | 0     | 157         | 154.8  | 159.7       | 162    | 159.0       | 166.3  | 160         | 157.1  | 163.1       | 164    | 161.5 | 166.1 | 166 | 163.3 | 168.6 |

  

| population vaccinated: 13.8 M (~60%) |       |             |        |             |        |             |        |             |        |             |        |       |       |     |       |       |
|--------------------------------------|-------|-------------|--------|-------------|--------|-------------|--------|-------------|--------|-------------|--------|-------|-------|-----|-------|-------|
| VEs                                  | VEd   | VEi         |        |             |        |             |        |             |        |             |        |       |       |     |       |       |
|                                      |       | 0           |        | 0.25        |        | 0.5         |        | 0.75        |        | 1           |        |       |       |     |       |       |
|                                      |       | day of peak | 95% CI |       |       |     |       |       |
| 0                                    | 0.9   | 147         | 144.8  | 149.0       | 158    | 154.2       | 160.6  | 169         | 163.8  | 175.4       | 185    | 181.3 | 188.7 | 195 | 195.0 | 195.0 |
| 0.225                                | 0.871 | 155         | 153.2  | 157.0       | 165    | 160.9       | 167.8  | 175         | 171.0  | 180.6       | 191    | 188.5 | 193.5 | 195 | 194.4 | 195.0 |
| 0.684                                | 0.684 | 175         | 172.5  | 178.1       | 181    | 178.9       | 184.3  | 186         | 181.9  | 190.3       | 193    | 189.4 | 194.7 | 195 | 194.4 | 195.0 |
| 0.871                                | 0.225 | 182         | 179.0  | 186.0       | 188    | 183.0       | 191.9  | 190         | 187.4  | 192.8       | 194    | 193.0 | 195.0 | 194 | 191.4 | 195.0 |
| 0.9                                  | 0     | 185         | 182.1  | 187.6       | 189    | 186.2       | 191.2  | 189         | 185.1  | 192.3       | 192    | 189.4 | 193.2 | 195 | 195.0 | 195.0 |

  

| population vaccinated: 18.4 M (~80%) |       |             |        |             |        |             |        |             |        |             |        |       |       |     |     |     |
|--------------------------------------|-------|-------------|--------|-------------|--------|-------------|--------|-------------|--------|-------------|--------|-------|-------|-----|-----|-----|
| VEs                                  | VEd   | VEi         |        |             |        |             |        |             |        |             |        |       |       |     |     |     |
|                                      |       | 0           |        | 0.25        |        | 0.5         |        | 0.75        |        | 1           |        |       |       |     |     |     |
|                                      |       | day of peak | 95% CI |       |       |     |     |     |
| 0                                    | 0.9   | 153         | 149.6  | 155.7       | 170    | 166.1       | 173.0  | 187         | 184.1  | 189.9       | 195    | 195.0 | 195.0 | 195 | 195 | 195 |
| 0.225                                | 0.871 | 164         | 161.0  | 167.5       | 180    | 176.2       | 184.6  | 195         | 195.0  | 195.0       | 195    | 195.0 | 195.0 | 195 | 195 | 195 |
| 0.684                                | 0.684 | 195         | 194.5  | 195.0       | 195    | 195.0       | 195.0  | 195         | 195.0  | 195.0       | 195    | 195.0 | 195.0 | 195 | 195 | 195 |
| 0.871                                | 0.225 | 195         | 195.0  | 195.0       | 195    | 195.0       | 195.0  | 195         | 195.0  | 195.0       | 195    | 195.0 | 195.0 | 195 | 195 | 195 |
| 0.9                                  | 0     | 195         | 195.0  | 195.0       | 195    | 195.0       | 195.0  | 195         | 195.0  | 195.0       | 195    | 195.0 | 195.0 | 195 | 195 | 195 |

  

| population vaccinated: 23 M (~100%) |       |             |        |             |        |             |        |             |        |             |        |    |     |     |    |     |
|-------------------------------------|-------|-------------|--------|-------------|--------|-------------|--------|-------------|--------|-------------|--------|----|-----|-----|----|-----|
| VEs                                 | VEd   | VEi         |        |             |        |             |        |             |        |             |        |    |     |     |    |     |
|                                     |       | 0           |        | 0.25        |        | 0.5         |        | 0.75        |        | 1           |        |    |     |     |    |     |
|                                     |       | day of peak | 95% CI |    |     |     |    |     |
| 0                                   | 0.9   | 123         | 99     | 151         | 89     | 63          | 119    | 105         | 67     | 143         | 74     | 60 | 88  | 75  | 44 | 113 |
| 0.225                               | 0.871 | 88          | 55     | 125         | 121    | 84          | 154    | 87          | 62     | 113         | 89     | 62 | 122 | 94  | 60 | 131 |
| 0.684                               | 0.684 | 131         | 107    | 155         | 84     | 59          | 117    | 101         | 79     | 127         | 113    | 82 | 142 | 87  | 54 | 126 |
| 0.871                               | 0.225 | 116         | 87     | 145         | 116    | 84          | 147    | 76          | 50     | 110         | 121    | 90 | 145 | 79  | 53 | 109 |
| 0.9                                 | 0     | 75          | 55     | 103         | 110    | 80          | 139    | 120         | 89     | 143         | 81     | 59 | 101 | 108 | 71 | 142 |

Table S16: Prevalence peak times (means and 95% ensemble bootstrap CIs) produced by the ABM for various combinations of vaccine efficacy parameters and coverage levels, assuming a clinical efficacy of VEc = 0.9 and active case-targeted NPIs consisting of case isolation, home-quarantine of household contacts of detected cases, and international travel restrictions (n = 10 instances per scenario).



## References

- [1] Billah MA, Miah MM, Khan MN. Reproductive number of coronavirus: A systematic review and meta-analysis based on global level evidence. *PLOS ONE*. 2020;15(11):e0242128.
- [2] Zachreson C, Fair KM, Harding N, Prokopenko M. Interfering with influenza: nonlinear coupling of reactive and static mitigation strategies. *Journal of The Royal Society Interface*. 2020;17(165):20190728.
- [3] Chang SL, Harding N, Zachreson C, Cliff OM, Prokopenko M. Modelling transmission and control of the COVID-19 pandemic in Australia. *Nature Communications*. 2020;11(1):1–13.
- [4] Zachreson C, Mitchell L, Lydeamore MJ, Rebuli N, Tomko M, Geard N. Risk mapping for COVID-19 outbreaks in Australia using mobility data. *Journal of the Royal Society Interface*. 2021;18(174):20200657.
- [5] Cliff OM, Harding M, Piraveen M, Erten Y, Gambhir M, Prokopenko M. Investigating spatiotemporal dynamics and synchrony of influenza epidemics in Australia: an agent-based modelling approach. *Simulation Modelling Practice and Theory*. 2018;87:412–431.
- [6] Centers for Disease Control and Prevention. Interim Guidance on Duration of Isolation and Precautions for Adults with COVID-19; 2020. <https://www.cdc.gov/coronavirus/2019-ncov/hcp/duration-isolation.html>.
- [7] Wu JT, Leung K, Bushman M, Kishore N, Niehus R, de Salazar PM, et al. Estimating clinical severity of COVID-19 from the transmission dynamics in Wuhan, China. *Nature Medicine*. 2020;26(4):506–510.
